1 **Longitudinal immune cell profiling in early systemic lupus erythematosus**

2 Takanori Sasaki<sup>1</sup>, Sabrina Bracero<sup>1</sup>, Joshua Keegan<sup>1</sup>, Lin Chen<sup>1</sup>, Ye Cao<sup>1</sup>, Emma  
3 Stevens<sup>1</sup>, Yujie Qu<sup>2</sup>, Guoxing Wang<sup>2</sup>, Jennifer Nguyen<sup>1</sup>, Stephen E. Alves<sup>2</sup>, James  
4 A. Lederer<sup>1</sup>, Karen H. Costenbader<sup>1</sup>, Deepak A. Rao<sup>1\*</sup>

5

6 <sup>1</sup> Brigham and Women's Hospital and Harvard Medical School, Boston, MA, USA

7 <sup>2</sup> Merck Sharp & Dohme Corp., a subsidiary of Merck & Co., Inc., Kenilworth, NJ,  
8 USA

9

10 \*Corresponding author

11 Deepak A. Rao

12 Brigham and Women's Hospital

13 Division of Rheumatology, Inflammation, and Immunity

14 Hale Building for Transformative Medicine, Room 6002

15 60 Fenwood Road

16 Boston MA 02115

17 [darao@bwh.harvard.edu](mailto:darao@bwh.harvard.edu)

18 617-525-1101

19

20

21 **Abstract**

22 **Objective:** To investigate the immune cell profiling and their longitudinal changes in  
23 systemic lupus erythematosus (SLE).

24 **Methods:** We employed mass cytometry with three different 38-39 marker panels  
25 (Immunophenotyping, T cell/monocyte, and B cell) in cryopreserved peripheral  
26 blood mononuclear cells (PBMCs) from nine patients with early SLE, 15 patients  
27 with established SLE, and 14 non-inflammatory controls. We used machine  
28 learning-driven clustering, FlowSOM (Flow Self-Organizing Maps) and dimensional  
29 reduction with tSNE (t-distributed Stochastic Neighbor Embedding) to identify  
30 unique cell populations in early and established SLE. For the nine early SLE patients,  
31 longitudinal mass cytometry analysis was applied to PBMCs at three time points (at  
32 enrollment, six months post-enrollment, and one year post-enrollment). Serum  
33 samples were also assayed for 65 cytokines by Luminex multiplex assay, and  
34 associations between cell types and cytokines/chemokines assessed.

35 **Results:** T peripheral helper cells (Tph cells), T follicular helper cells (Tfh cells) and  
36 several Ki67<sup>+</sup> proliferating subsets (ICOS<sup>+</sup> Ki67<sup>+</sup> CD8 T cells, Ki67<sup>+</sup> regulatory T  
37 cells, CD19<sup>int</sup> Ki67<sup>hi</sup> plasmablasts, and Ki67<sup>hi</sup> PU.1<sup>hi</sup> monocytes) were increased in  
38 early SLE. Longitudinal mass cytometry and multiplex serum cytokine assays of  
39 samples from early SLE patients revealed that Tfh cells and CXCL10 decreased at  
40 one year post-enrollment. CXCL13 correlated positively with several of the  
41 expanded cell populations in early SLE.

42 **Conclusions:** Two major helper T cell subsets and unique Ki67<sup>+</sup> proliferating  
43 immune cell subsets were expanded in the early phase of SLE, and the immunologic  
44 features characteristic of early SLE evolved over time.

45            Systemic lupus erythematosus (SLE) is a prototypical autoimmune disease  
46 that affects multiple vital organs. Untreated immune activation in SLE can lead to  
47 tissue inflammation and irreversible organ damage, thus rapid recognition of lupus  
48 disease activity is an important goal in the care of patients with SLE. Delays in  
49 treatment are associated with poorer treatment responses and worse outcomes  
50 (1-3).

51            Despite the importance of early recognition and intervention, diagnosis of  
52 early SLE is often difficult because initial manifestations of the disease frequently  
53 include relatively non-specific symptoms. Fever, autoantibody production,  
54 hypocomplementemia and leukopenia are relatively common in early SLE (4),  
55 indicating that systemic immunologic features are already altered in the early phase.  
56 We hypothesize that defining the alterations in immune cell populations early in  
57 disease will provide critical insights into the early evolution of pathologic immune cell  
58 activation in SLE and may yield key metrics to diagnose SLE in the early phase.

59            A series of single-cell RNA sequencing studies from inflamed tissues recently  
60 identified aberrant immune cell expansions and cytokine/chemokine-mediated  
61 cellular networks within the affected organs in SLE (5, 6). These unbiased analyses  
62 provided broad and robust information on the composition of the immune cell  
63 infiltrates in the kidney in lupus nephritis. However, since multiple biopsies are  
64 difficult in most cases and most of the tissue samples were obtained from patients  
65 with established disease, there is limited information on immunologic features early  
66 in disease and little description of changes in inflammatory features between early  
67 and later established phases of disease. This information is important for the  
68 definition of immune response evolution over time in lupus, which may provide  
69 insights into differences in treatment response over time. From this perspective,

70 blood samples are easier to access and analyse longitudinally, yet few longitudinal  
71 studies of associations between immunophenotype and clinical features in SLE over  
72 time have been reported (7, 8).

73         Mass cytometry (or Cytometry by Time Of Flight, CyTOF) is a powerful tool to  
74 broadly assess surface markers as well as intracellular proteins on immune cells.  
75 Dimensional reduction and visualization with tSNE (t-distributed Stochastic  
76 Neighbor Embedding) (9) combined with machine learning-driven clustering with  
77 methods such as FlowSOM (Flow Self-Organizing Maps) (10) allow for  
78 discrimination of distinct immune cell clusters in an unbiased way. Previously, the  
79 increase of PD-1<sup>hi</sup> CXCR5<sup>-</sup> CCR2<sup>+</sup> CD4 T cells (T peripheral helper cells; Tph cells)  
80 in the peripheral blood of patients with SLE was identified by this methodology (11).  
81 CCR2 is a homing protein that promotes migration of immune cells to inflammatory  
82 sites, suggesting that the increase of the circulating immune cell subset reflects an  
83 inflammatory condition in the affected sites. Two studies have recently reported  
84 analyses using mass cytometry to examine blood samples from patients with  
85 established SLE (12, 13), but the longitudinal changes have not yet been studied.

86         Here we report broad mass cytometry data analyses with three different  
87 38-39 marker panels in blood cells from patients with a new diagnosis of SLE. We  
88 first identified several unique immune cell populations in early SLE through  
89 unsupervised clustering and then verified the frequencies of these immune cell  
90 subsets. We further investigated the immune cell frequencies and serum cytokine  
91 levels in early SLE over time (at enrollment, six months, and 12 months post-  
92 enrollment). These longitudinal analyses indicated that several unique Ki67<sup>+</sup>  
93 proliferating immune cell subsets are expanded even in the early phase of SLE and  
94 remain consistently elevated over time. In contrast, T follicular helper cells (Tfh cells)

95 appeared elevated early after diagnosis and decreased over time. Serum cytokine  
96 profiling identified CXCL10, CD40L, IL-20, and TWEAK increased in early SLE, but  
97 among them, CXCL10 decreased longitudinally. Our data provide a detailed  
98 assessment of the immunologic features characteristic of early SLE as well as their  
99 changes over time.

100

## 101 **Results**

### 102 **An unsupervised cell clustering view of the immune cell landscape in SLE.**

103 To investigate immunological and longitudinal changes in SLE, we evaluated  
104 cross-sectional and longitudinal analyses of peripheral blood mononuclear cells  
105 (PBMCs) by mass cytometry using three different panels (broad immunophenotype  
106 panel, T cell/monocyte-focused panel, and B cell-focused panel), along with  
107 65-analyte serum cytokine profiling data (**Figure 1A, S-Table 1**). As an overview of  
108 our approach, we first applied unsupervised cell clustering using FlowSOM and  
109 dimensionality reduction by tSNE to the cross-sectional mass cytometry data from  
110 nine patients with early SLE who were enrolled within six months after the diagnosis,  
111 15 patients with established SLE, and 14 non-inflammatory controls to identify  
112 distinct populations in an unbiased way. Early SLE patients were younger than  
113 established SLE patients (21.6 vs 36.5 years old,  $P < 0.001$ ), and corticosteroid (CS)  
114 use (33.3 vs 93.3%,  $P = 0.03$ ) and the dose (2.5 vs 14.5 mg/day,  $P = 0.01$ ) were higher  
115 in established SLE patients. SLEDAI-2K disease activity were comparable between  
116 the two groups (5.8 vs 5.1,  $P = 0.80$ ) (**S-Table 2, 3**). We then investigated the  
117 longitudinal changes of the distinct immune cell populations and 65 cytokine levels  
118 from the nine patients with early SLE (**Figure 1B**), at three time points (A = at  
119 enrollment, B = six months after the enrollment, C = 12 months after the enrollment).

120 Finally, we analysed associations between cell types and cytokines by hierarchical  
121 clustering.

122 For an initial, high-level view of the circulating immune cell populations, we  
123 first performed tSNE clustering of Immunophenotype panel mass cytometry data  
124 from the cross-sectional cohorts (**Figure 1C**). tSNE allowed clear visualization of  
125 distinct immune cell clusters, including three major CD3<sup>+</sup> T cell populations, CD3<sup>-</sup>  
126 CD56<sup>+</sup> NK cells, CD19<sup>+</sup> B cells, CD14<sup>+</sup> monocytes, CD14<sup>-</sup> CD11c<sup>+</sup> myeloid dendritic  
127 cells (mDCs). Two of the CD3<sup>+</sup> clusters were CD3<sup>+</sup> CD4<sup>+</sup> T cells and CD3<sup>+</sup> CD8<sup>+</sup> T  
128 cells. A third cluster, CD3<sup>+</sup> CD4<sup>-</sup> CD8<sup>-</sup> T cells expressed TCR $\gamma\delta$ , identifying this  
129 population as  $\gamma\delta$  T cells. Among these high-level immune cell subsets, the proportion  
130 of CD3<sup>+</sup> CD8<sup>+</sup> T cells was increased and the proportion of CD3<sup>+</sup> CD4<sup>+</sup> T cells was  
131 decreased in established SLE patients compared to controls, but none of these  
132 populations were higher in early SLE compared to controls.

133

#### 134 **Expanded Ki67<sup>+</sup> activated CD8 T cells in SLE patients.**

135 We next investigated changes in CD8 T cell populations in early SLE. To  
136 identify cell populations that differ between controls and SLE patients, we clustered  
137 CD8 T cells based on the 39-marker T cell-focused panel using FlowSOM. We  
138 compared the abundances of the clusters between SLE and controls and identified  
139 metacluster 10 as significantly increased in early SLE patients (5.2-fold, P<0.05,  
140 Kruskal-Wallis with Dunn's multiple comparisons test) (**Figure 2A**). Heatmap  
141 expression analysis revealed that metacluster 10 contained cells with high  
142 expression of Ki67 and ICOS, suggesting that they are proliferating CD8 T cells  
143 (**Figure 2B**). Metaclusters 5 and 9 showed a similar expression pattern to  
144 metacluster 10 with high expression of Ki67 and ICOS and tended to be higher in

145 SLE (**Figure 2A**). tSNE visualization of merged data from early SLE patients  
146 confirmed that the Ki67<sup>+</sup> proliferative population expressed ICOS (**Figure 2C**). This  
147 population also expressed PD-1 and HLA-DR, suggesting that these are activated  
148 CD8 T cells. Interestingly, the Ki67<sup>+</sup> CD8 T cells did not highly express granzyme B  
149 and granzyme K. Biaxial plots demonstrated that Ki67<sup>+</sup> ICOS<sup>+</sup> CD8 T cells  
150 significantly increased in early SLE compared to controls (0.8 vs 3.5%,  $P < 0.01$ ,  
151 Kruskal-Wallis with Dunn's multiple comparisons test) (**Figure 2D**).

152 In longitudinal analyses including time points six and 12 months  
153 post-enrollment, Ki67<sup>+</sup> ICOS<sup>+</sup> CD8 T cells remained persistently elevated over time.  
154 Disease activity in this patient cohort remained similarly active during this time frame  
155 (**Figure 2E, F**). We also identified metacluster 13, which contained T cells with high  
156 expression of CD94, CD56, and TCRV $\delta$ 2, as significantly decreased in early SLE  
157 and established SLE patients (**Figure 2A, B**). Metacluster 3, which contained CD96<sup>+</sup>  
158 CD8 T cells, was reduced in established SLE, but not in early SLE (**Figure 2A, B**).

159

#### 160 **Tfh cells but not Tph cells decreased over time in early SLE.**

161 We next applied FlowSOM to CD4 T cells in controls and SLE patients. We  
162 identified metaclusters 6 (2.3-fold,  $P < 0.01$ ), 13 (5.8-fold,  $P < 0.01$ ), 14 (2.8-fold,  
163  $P < 0.05$ ), and 15 (3.9-fold,  $P < 0.01$ ) significantly increased in early SLE patients at  
164 diagnosis (**Figure 3A**). Cells in metacluster 6 and metacluster 13 highly expressed  
165 PD-1, ICOS, and CD40L, but lacked CXCR5, suggesting that these two  
166 metaclusters contained Tph cells (**Figure 3B**). Interestingly, these two clusters were  
167 quite different in expression of CXCR3 and T-bet; low expression in metacluster 6  
168 and high expression in metacluster 13. Metacluster 14 could be classified as Tfh  
169 cells with the high expression of PD-1, ICOS, and CXCR5. Metacluster 15

170 demonstrated a proliferating Treg phenotype with high expression of Ki67, FoxP3,  
171 CTLA-4, Helios, CD25, and CD39, and low expression of CD127 (**Figure 3B**). tSNE  
172 visualization revealed distinct clusters of PD-1 in either CXCR5<sup>+</sup> or CXCR5<sup>-</sup> regions  
173 and Ki67<sup>+</sup> FoxP3-expressing Treg in early SLE patients (**Figure 3C**).

174 Quantification by biaxial gating confirmed that CXCR5<sup>-</sup> PD-1<sup>hi</sup> Tph cells  
175 (controls: 3.0%, early SLE: 7.0%, established SLE: 8.9%, P<0.05 in controls vs early  
176 SLE, P<0.01 in controls vs established SLE), CXCR5<sup>+</sup> PD-1<sup>hi</sup> Tfh cells (controls:  
177 2.0%, early SLE: 6.2%, established SLE: 4.4%, P<0.001 in controls vs early SLE,  
178 P<0.05 in controls vs established SLE), and Ki67<sup>+</sup> FoxP3<sup>+</sup> Treg cells (controls: 1.0%,  
179 early SLE: 3.6%, established SLE: 2.5%, P<0.01 in controls vs early SLE, P<0.01 in  
180 controls vs established SLE) were increased in both early SLE and established SLE  
181 patients (**Figure 3D, E**). We also found that Tph cells and Ki67<sup>+</sup> Treg cells were  
182 consistently elevated at one year after the diagnosis, whereas Tfh cells decreased  
183 over time in the early SLE cohort (**Figure 3F**). The proportion of Tfh cells did not  
184 correlate with corticosteroid dose and was not significantly different between the  
185 patients treated with prednisone >10mg and/or mycophenolate mofetil (MMF) and  
186 those without, suggesting that the decrease is independent from  
187 immunosuppressive treatment (**Figure 3G**). We identified metaclusters 1 and 3  
188 significantly decreased in established SLE patients (**Figure 3A**). These metaclusters  
189 highly expressed CD127 and CD40L, but CXCR5 was quite distinct between  
190 metacluster 1 (CXCR5<sup>-</sup>) and metacluster 3 (CXCR5<sup>+</sup>) (**Figure 3B**).

191

### 192 **Increased CD19<sup>int</sup> Ki67<sup>hi</sup> plasmablasts in early SLE.**

193 We next applied the same clustering approach to CD19<sup>+</sup> B cells, now using  
194 the B cell-focused mass cytometry panel (**S-Table 1**). We found metacluster 4



195 increased in early SLE patients (4.7-fold,  $P < 0.05$ ), metaclusters 11, 12, 13, and 15  
196 increased in established SLE patients, and metacluster 14 increased in both early  
197 SLE (3.0-fold,  $P < 0.05$ ) and established SLE (**Figure 4A**). Expression heatmap  
198 analysis indicated that metacluster 4 contained a  $CD19^{int} Ki67^{hi}$  population with high  
199 expression of CD27 and CD38, indicating proliferating plasmablasts (**Figure 4B**).  
200 We also identified 5 metaclusters consistent with  $CD11c^{+} T-bet^{+} CD21^{low} CXCR5^{-}$   
201 age-associated B cells (ABCs):  $HLA-DR^{+} CD38^{-} IgG^{+}$  ABCs (metacluster 11),  
202  $HLA-DR^{++} CD38^{+} Ki67^{+} IgG^{+}$  ABCs (metacluster 12),  $CD1c^{+} IgM^{+}$  ABCs  
203 (metacluster 13),  $IgM^{+} IgD^{+}$  ABCs (metacluster 14), and  $CD11c^{hi} T-bet^{hi}$  ABCs  
204 (metacluster 15). tSNE visualization demonstrated distinct marker expression of  
205  $CD19^{int} Ki67^{hi}$  plasmablasts and  $CD11c^{+} T-bet^{+} CD21^{low} CXCR5^{-}$  ABCs in early SLE  
206 (**Figure 4C**). Biaxial plots confirmed that the  $CD19^{int} Ki67^{hi}$  population contained  
207  $CD27^{+} CD38^{+}$  plasmablasts, but  $CD19^{hi} Ki67^{low}$  population did not (**Figure 4D**).  
208  $CD19^{int} Ki67^{hi} CD27^{+} CD38^{+}$  plasmablasts were significantly increased in early SLE  
209 patients (controls: 0.07%, early SLE: 0.88%, established SLE: 0.18%,  $P < 0.01$  in  
210 controls vs early SLE), whereas  $CD11c^{+} CD21^{low}$  ABCs were more expanded in  
211 established SLE patients (controls: 3.8%, early SLE: 7.6%, established SLE: 14.8%,  
212  $P < 0.001$  in controls vs established SLE) (**Figure 4D, E**).  $CD19^{int} Ki67^{hi} CD27^{+}$   
213  $CD38^{+}$  plasmablasts were significantly lower in established SLE compared to early  
214 SLE patients, but also significantly lower in the SLE patients treated with prednisone  
215  $> 10mg$  and/or MMF compared the others (0.14% vs 1.1%,  $P < 0.01$ ) (**S-Figure 1**),  
216 suggesting that treatment may affect plasmablast abundance in treated SLE  
217 patients. Consistent with the increased abundance of metacluster 14 in early SLE,  
218  $IgM^{+} IgD^{+}$  ABCs were significantly higher in early SLE patients compared to controls  
219 (**Figure 4F**). For other subclasses, almost 40% of  $CD19^{int} Ki67^{hi} CD27^{+} CD38^{+}$

220 plasmablasts were IgA, and IgG was rare, whereas IgG was more frequent (20%) in  
221 CD11c<sup>+</sup> CD21<sup>low</sup> ABCs (**Figure 4G**), indicating that class-switching isotypes were  
222 different in CD19<sup>int</sup> Ki67<sup>hi</sup> CD27<sup>+</sup> CD38<sup>+</sup> plasmablasts and CD11c<sup>+</sup> CD21<sup>low</sup> ABCs. In  
223 longitudinal analyses, CD19<sup>int</sup> Ki67<sup>hi</sup> CD27<sup>+</sup> CD38<sup>+</sup> plasmablasts and ABCs, and IgG  
224 or IgA class-switched CD19<sup>int</sup> Ki67<sup>hi</sup> CD27<sup>+</sup> CD38<sup>+</sup> plasmablasts and ABCs, stayed  
225 at high levels at one year after enrollment (**S-Figure 2, Figure 4H**). We also  
226 identified metacluster 6, which contained IgA<sup>+</sup> IgD<sup>-</sup> CD27<sup>+</sup> memory B cells, as  
227 relatively decreased in early SLE patients.

228

#### 229 **Increased PU.1<sup>hi</sup> Ki67<sup>hi</sup> monocytes in early SLE.**

230 In the CD14<sup>+</sup> monocyte FlowSOM analysis using the T cell/monocyte panel,  
231 metacluster 8 was decreased and metacluster 13 was increased in early (5.6-fold,  
232 P<0.05) and established SLE patients compared to controls (**Figure 5A**). Heatmap  
233 analysis indicated that metacluster 13 contained HLA-DR<sup>-</sup> PU.1<sup>hi</sup> Ki67<sup>hi</sup> monocytes  
234 (**Figure 5B**). tSNE visualization confirmed that Ki67<sup>hi</sup> monocytes highly expressed  
235 PU.1 but not HLA-DR (**Figure 5C**). Biaxial plots revealed that metacluster 13 was  
236 well correlated with HLA-DR<sup>-</sup> Ki67<sup>hi</sup> monocytes and PU.1<sup>hi</sup> Ki67<sup>hi</sup> monocytes but  
237 more strongly in PU.1<sup>hi</sup> Ki67<sup>hi</sup> monocytes (**Figure 5D**). Consistent with the FlowSOM  
238 analysis, PU.1<sup>hi</sup> Ki67<sup>hi</sup> monocytes were increased in patients with early SLE, with  
239 comparable levels to established SLE patients (controls: 7.6%, early SLE: 29.6%,  
240 established SLE: 29.7%, P<0.05 in controls vs early SLE, P<0.05 in controls vs  
241 established SLE) (**Figure 5E**). PU.1<sup>hi</sup> Ki67<sup>hi</sup> monocytes expressed higher levels of  
242 CCR2 compared to PU.1<sup>low</sup> Ki67<sup>low</sup> monocytes (P<0.001) (**Figure 5F**). PU.1<sup>hi</sup> Ki67<sup>hi</sup>  
243 monocyte frequency did not change over time in early SLE patients (**Figure 5G**).

244

## 245 **Associations between expanded immune cell populations in SLE.**

246 Since the analyses across multiple mass cytometry panels revealed that  
247 several Ki67<sup>+</sup> proliferating populations were expanded in patients with SLE, we  
248 hypothesized that Ki67<sup>+</sup> NK cells would also be increased in SLE. As we expected,  
249 biaxial plots indicated that NKG2D<sup>+</sup> Ki67<sup>+</sup> CD3<sup>-</sup> CD56<sup>+</sup> NK cells were highly  
250 increased in SLE, with stable levels in patients with early SLE over time (**Figure 6A,**  
251 **B**). The Ki67<sup>+</sup> population did not express PD-1, HLA-DR, and ICOS, unlike Ki67<sup>+</sup>  
252 CD4 or CD8 T cells (**Figure 6C**). Next, to identify associations between expanded  
253 immune cell populations in early SLE, we applied a hierarchical clustering analysis  
254 using the frequencies of Ki67<sup>+</sup> ICOS<sup>+</sup> CD8 T cells, Tph cells, Tfh cells, IgG<sup>+</sup> CD19<sup>int</sup>  
255 Ki67<sup>hi</sup> plasmablasts, IgA<sup>+</sup> CD19<sup>int</sup> Ki67<sup>hi</sup> plasmablasts, IgG<sup>+</sup> ABCs, IgA<sup>+</sup> ABCs,  
256 PU.1<sup>hi</sup> Ki67<sup>hi</sup> monocytes, and NKG2D<sup>+</sup> Ki67<sup>+</sup> NK cells. This analysis segregated cell  
257 populations into clusters with distinct patterns, including one cluster of PU.1<sup>hi</sup> Ki67<sup>hi</sup>  
258 monocytes and NKG2D<sup>+</sup> Ki67<sup>+</sup> NK cells (innate immunity cluster), one cluster of  
259 Ki67<sup>+</sup> ICOS<sup>+</sup> CD8 T cells, Tph cells, and Tfh cells (T cell cluster), and one larger  
260 cluster of IgG<sup>+</sup> CD19<sup>int</sup> Ki67<sup>hi</sup> plasmablasts, IgA<sup>+</sup> CD19<sup>int</sup> Ki67<sup>hi</sup> plasmablasts, IgG<sup>+</sup>  
261 ABCs, and IgA<sup>+</sup> ABCs (B cell cluster) (**Figure 6D**). Notably, Tph cells correlated with  
262 ABCs ( $\rho=0.51$   $P=0.006$ ) and CD19<sup>int</sup> Ki67<sup>hi</sup> plasmablast ( $\rho=0.43$   $P=0.01$ ), whereas  
263 Tfh cells did not (**Figure 6E**).

264

## 265 **Longitudinal cytokine and chemokine profiling in early SLE.**

266 We next measured levels of 65 cytokines and chemokines in serum from 9  
267 controls and nine early SLE patients, with the early SLE patients again analysed at  
268 three timepoints as in the cytometry analyses. Among the 65 cytokines/chemokines  
269 we selected *a priori* to be potentially important in early SLE pathogenesis, 33

270 cytokines were detected in serum samples. Interestingly, these cytokines positively  
271 correlated with each other together, suggesting a co-ordinately regulated underlying  
272 cytokine network in early SLE (**Figure 7A**). Most cytokines, with the exception of  
273 IL-16, had higher levels in early SLE samples, and IL-2R, CXCL10, CXCL13,  
274 IL-12p70, IL-17A, TSLP, CCL8, CCL24, TNF-RII, IL-2, IL-20, CD40L, CCL3, CD30,  
275 and TWEAK were significantly increased in early SLE samples, and CXCL10,  
276 CD40L, IL-20, and TWEAK remaining significantly higher even after Bonferroni  
277 correction to adjust for multiple testing (**Figure 7B, S-Figure 3, S-Figure 4**). Among  
278 these four cytokines, CXCL10 ( $P=0.03$ ) was significantly decreased at 1 year after  
279 diagnosis, but CD40L, IL-20, and TWEAK stayed high levels. (**Figure 7C, S-Figure**  
280 **5**). Next, to clarify the potential association between immune cells and chemokines,  
281 we investigated correlations between immune cell frequencies and serum  
282 chemokine levels in early SLE. Notably, CXCL13 broadly and strongly correlated  
283 with expanded lymphocyte subsets (Tph, Tfh, Ki67<sup>hi</sup> ICOS<sup>+</sup> CD8, ABC,  
284 plasmablasts) in samples from patients with SLE (**Figure 7D**). In contrast, CCL2 was  
285 strongly correlated with PU.1<sup>hi</sup> Ki67<sup>hi</sup> monocytes, the subset that highly expressed  
286 CCR2, suggesting the involvement of CCL2-CCR2 axis for PU.1<sup>hi</sup> Ki67<sup>hi</sup> monocytes  
287 migration to inflamed sites. These results suggest that different co-regulated  
288 pathways, which link cell types to related circulating factors, are active in early SLE  
289 patients.

290

## 291 **Discussion**

292 By broad and longitudinal cellular immunophenotyping and serum  
293 cytokine/chemokine profiling, we identified multiple expanded immune cell  
294 populations in patients with early SLE and evaluated their changes in the first year of

295 disease and their relationships with serum cytokines/chemokines. We found that  
296 several lymphocyte populations expanded in early SLE share a common feature of  
297 expression of Ki67, a well-established marker of lymphocyte proliferation. This  
298 shared cytometric feature may capture the broad, active immune response occurring  
299 in early SLE. These Ki67<sup>+</sup> populations, as well as Tph cells and ABCs, remain  
300 consistently elevated over the first year and are similarly elevated in established SLE  
301 patients, suggesting that these pathways are activated early and continue to  
302 characterize the pathologic immune response in SLE.

303 Notably, we also identified specific features of the immune response that  
304 change over time in early SLE patients. In particular, Tfh cells decreased over time in  
305 early SLE patients. Although Tfh cells and some of their inducing factors, such as  
306 IL-12, have been considered as therapeutic targets in SLE (14, 15), a phase III study  
307 of ustekinumab, a monoclonal antibody targeting interleukin IL-12 and IL-23, was  
308 discontinued due to the lack of efficacy (LOTUS study; NCT03517722). Since Tfh  
309 expanded initially, but decreased longitudinally, this target may have the therapeutic  
310 “window of opportunity”. Moreover, CD40L, IL-20, and TWEAK were increased at  
311 the initial time point and persistently elevated, while CXCL10 decreased over time.  
312 These data suggested that immune profiles change in each phase of SLE (**Figure 8**),  
313 such that quantification of some features of the immune response in SLE need to be  
314 adjusted based on disease duration.

315 Diagnosing early SLE is challenging because the initial clinical manifestations  
316 are often non-specific. Identifying the immune system activation associated with  
317 early SLE may help to diagnose SLE as early as possible. Our study revealed that  
318 both antibody-secreting plasmablasts and B cell-helper T cells, including Tfh cells  
319 and Tph cells, were activated in the early phase and could be markers for early SLE.

320 Since autoantibodies are increased several years prior to SLE onset (16), but not all  
321 autoantibody positive individuals develop SLE, it will be of major interest to  
322 determine whether alterations in circulating activated B cells and B cell-helper T can  
323 serve as specific hallmarks to predict risk of developing clinically evident SLE.

324 Both Tph cells and Tfh cells contribute to B cell responses through the  
325 production of IL-21, CD40L, and CXCL13 (17, 18). Strikingly, Tph cells stayed at  
326 high levels during the first year post-enrollment, whereas Tfh cells decreased  
327 longitudinally, suggesting distinct roles for Tph cells and Tfh cells over the course of  
328 the disease. One major difference between Tph cells and Tfh cells is their  
329 chemokine receptor expression, which determines their migratory capacity. Tph  
330 cells migrate into local inflammatory sites through receptors such as CCR2 and  
331 CCR5, while Tfh cells accumulate in B cell follicles within secondary lymphoid  
332 organs via a CXCR5-CXCL13 axis (19). Our data imply that Tfh-B cell interactions in  
333 secondary lymphoid organs may be particularly important at the initial onset of SLE,  
334 but the importance may shift to Tph-B cell interactions at local inflammatory sites  
335 over time. We did collect detailed data on SLE therapies administered to the newly  
336 diagnosed patients, but our small sample size precludes detailed analysis of how  
337 these therapies may impact lymphocyte populations and cytokines/chemokines over  
338 the first year of disease and this also deserves further study.

339 In the B cell analysis, the dominant subclasses differed in ABCs and CD19<sup>int</sup>  
340 Ki67<sup>hi</sup> plasmablasts. Recent broad BCR analysis of six different autoimmune  
341 diseases indicated that plasmablasts expressed more IgA1/2 compared to IgG1/2,  
342 whereas IgD<sup>-</sup> CD27<sup>-</sup> B cells, which contain much of the ABC population, expressed  
343 more IgG1/2 (20). Among these six autoimmune diseases, the frequency of IgA1/2  
344 in PBMC B cells was higher in SLE, IgA vasculitis, Crohn's disease, and Bechet's

345 disease compared to healthy controls. Considering that the mucosal associated  
346 lymphoid tissues (MALT) or gut-associated lymphoid tissues (GALT) are the main  
347 source of IgA<sup>+</sup> plasmablasts (21), intestinal dysbiosis might be involved in the  
348 increase of plasmablasts in SLE.

349 We found that an expanded monocyte population in SLE expressed elevated  
350 levels of PU.1, a transcription factor implicated in macrophage development and  
351 function (22). Previous single-cell RNA-seq analyses of kidney biopsy samples  
352 suggested that inflammatory monocytes differentiate into phagocytic and M2-like  
353 macrophages in lupus nephritis (5). As PU.1<sup>hi</sup> Ki67<sup>hi</sup> monocytes expressed CCR2  
354 and correlated well with serum CCL2, this monocyte population in the blood may be  
355 a precursor of inflammatory monocytes that infiltrate tissues.

356 A hierarchical clustering of immune cell subsets revealed distinct clusters of  
357 immune subsets with correlated abundance patterns, including clusters reflective of  
358 innate immunity, T cell activation, and B cell activation. Of note, Tph cells and Ki67<sup>+</sup>  
359 ICOS<sup>+</sup> CD8 T cells were strongly correlated, suggesting that these two subsets may  
360 be regulated through a common inducing factor. In this context, type I IFN may play  
361 an important role in the regulation. A series of RNA-seq analyses indicated that IFN  
362 signatures were highly enriched in Tph cells in SLE (11) and Ki67<sup>hi</sup> CD8 T cells in  
363 immune checkpoint inhibitor-associated arthritis patients (23). In addition, type I IFN  
364 has negative regulatory effects on the expression of CXCR5 (24, 25). As Tph cells  
365 and Ki67<sup>+</sup> ICOS<sup>+</sup> CD8 T cells may be pathogenic drivers of SLE, anifrolumab, a fully  
366 human monoclonal antibody against the type I IFN receptor (26), may act to  
367 ameliorate the disease activity in part through the regulation of Tph cells and Ki67<sup>+</sup>  
368 ICOS<sup>+</sup> CD8 T cells.

369           Our study has several limitations. The relatively small cohort of early SLE  
370 patients followed limits the ability to identify co-correlated immune features and  
371 precludes evaluation of clinical correlates of the cellular features identified. A larger  
372 cohort will be required in subsequent studies to determine the potential prognostic  
373 significance of the immune features detected here. We have quantified cytometric  
374 and serum protein features but have not interrogated transcriptional programs. In  
375 addition, our study focuses only on blood samples and does not contain parallel  
376 tissue studies. Nonetheless, the substantial alterations demonstrated in circulating  
377 immune cells from patients with lupus support the idea that clinically relevant signals  
378 may be detectable in blood samples.

379           In conclusion, this study highlighted persistent activation of Tph, ABCs, and  
380 Ki67<sup>+</sup> proliferating immune cells populations in the blood in early SLE and  
381 underscores the value of broad, longitudinal immunophenotyping to define patterns  
382 of SLE immune activity that may help refine potential biomarkers and prioritize  
383 therapeutic targets for early and established phases of SLE.

384

## 385 **Methods**

### 386 **Study Subjects**

387           All SLE patients met 1997 ACR classification criteria (27). For the early SLE  
388 cohort, nine SLE patient were who were within six months of disease diagnosis and  
389 without treatment with major immunosuppressive therapies (treatment with  
390 prednisone  $\leq$  10mg and hydroxychloroquine were permitted). For the  
391 cross-sectional study, 14 non-inflammatory controls and 15 patients with established  
392 SLE were also included. For the longitudinal cytometry study, the same nine patients  
393 with early SLE were evaluated at six months and 12 months after enrollment. For



394 serum analyses, the same nine early SLE patients were evaluated, along with nine  
395 non-inflammatory controls different from the cross-sectional study. Detailed clinical  
396 information is shown in Supplementary Table 2, 3.

397

### 398 **Mass cytometry**

399 Blood samples were collected into heparin tubes and PBMCs were isolated  
400 by density centrifugation using Ficoll-Hypaque in 50mL conical tubes. PBMCs were  
401 washed by PBS and cryopreserved in a 10% DMSO + 90% FBS solution. Samples  
402 from the cross-sectional cohorts as well as longitudinal samples from the early SLE  
403 cohort were collected and thawed together in batches of 20 samples per batch (total  
404 three batches) and processed for mass cytometry within a one-week period. The  
405 three longitudinal samples from each early SLE patient were included in the same  
406 batch to minimize potential batch effects.

407 Cryopreserved PBMCs were thawed into RPMI Medium 1640 (Life  
408 Technologies #11875-085) supplemented with 5% heat-inactivated fetal bovine  
409 serum (Life Technologies #16000044), 1 mM GlutaMAX (Life Technologies  
410 #35050079), antibiotic-antimycotic (Life Technologies #15240062), 2 mM MEM  
411 non-essential amino acids (Life Technologies #11140050), 10 mM HEPES (Life  
412 Technologies #15630080),  $2.5 \times 10^{-5}$  M 2-mercaptoethanol (Sigma-Aldrich #M3148),  
413 20 units/mL sodium heparin (Sigma-Aldrich #H3393), and 25 units/mL benzonase  
414 nuclease (Sigma-Aldrich #E1014). Cells were counted and  $0.5 \times 10^6$  cells from  
415 each sample were transferred to a polypropylene plate for staining. The samples  
416 were spun down and aspirated. 5  $\mu$ M of cisplatin viability staining reagent (Fluidigm  
417 #201064) was added for two minutes and then diluted with culture media. After  
418 centrifugation, Human TruStain FcX Fc receptor blocking reagent (BioLegend

419 #422302) was used at a 1:100 dilution in PBS with 2.5 g bovine serum albumin  
420 (Sigma Aldrich #A3059) and 100 mg of sodium azide (Sigma Aldrich #71289) for 10  
421 minutes followed by incubation with conjugated surface antibodies for 30 minutes.  
422 All antibodies were obtained from the Harvard Medical Area CyTOF Antibody  
423 Resource and Core (Boston, MA).

424 16% stock paraformaldehyde (Fisher Scientific #O4042-500) dissolved in  
425 PBS was used at a final concentration of 4% formaldehyde for 10 minutes in order to  
426 fix the samples before permeabilization with the FoxP3/Transcription Factor Staining  
427 Buffer Set (ThermoFisher Scientific #00-5523-00). The samples were incubated with  
428 SCN-EDTA coupled palladium based barcoding reagents for 15 minutes and then  
429 combined into a single sample. Conjugated intracellular antibodies were added into  
430 each tube and incubated for 30 minutes. Cells were then fixed with 1.6%  
431 formaldehyde for 10 minutes. DNA was labelled for 20 minutes with an 18.75  $\mu$ M  
432 iridium intercalator solution (Fluidigm #201192B). Samples were subsequently  
433 washed and reconstituted in Milli-Q filtered distilled water in the presence of EQ Four  
434 Element Calibration beads (Fluidigm #201078) at a final concentration of  $1 \times 10^6$   
435 cells/mL. Samples were acquired on a Helios CyTOF Mass Cytometer (Fluidigm).  
436

### 437 **FlowSOM and tSNE analyses**

438 The raw FCS files were normalized to reduce signal deviation between  
439 samples over the course of multi-day batch acquisitions, utilizing the bead standard  
440 normalization method established by Finck et al (28). These normalized files were  
441 then deconvoluted into individual sample files using a single-cell based debarcoding  
442 algorithm established by Zunder et al (29) Mass cytometry data were gated to  
443 exclude debris and identify DNA<sup>+</sup> events. Non-viable cisplatin<sup>+</sup> cells and equalization

444 beads were excluded. FlowSOM analyses were performed using Cytobank. HCs  
445 (n=14) and SLE (n=24: early SLE n=9, established SLE n=15) samples were  
446 included. Metacluster and cluster numbers were 15 and 225, respectively. Each  
447 metacluster abundances were compared between HCs, early SLE, and established  
448 SLE. Heatmap analyses were performed with Z score of metacluster medians in  
449 each marker. For tSNE clustering, HCs and SLE fcs files were concatenated using  
450 FlowJo 10.4.2. tSNE analyses using Cytobank was performed with equal number  
451 events from the concatenated HCs or SLE fcs files. Gating for cell frequencies and  
452 expression intensity quantification were performed using FlowJo 10.4.2.

453

#### 454 **Cytokines**

455 65 cytokines (Supplementary figure 1) were measured by Luminex multiplex  
456 assay according to the manufacturer's instructions. Associations between cytokines,  
457 and association cytokines and cell types assessed with heatmap analysis using  
458 Spearman's correlation coefficient.

459

#### 460 **Study approval**

461 SLE patients and non-inflammatory controls were enrolled at Brigham and  
462 Women's Hospital with informed consent under IRB protocols (2014P002558 and  
463 2016P001660) approved by Mass General Brigham IRB.

464

#### 465 **Statistics**

466 Statistical comparisons were performed in Prism. Mann-Whitney test was  
467 used for comparison between two groups, and Kruskal-Wallis with Dunn's multiple  
468 comparisons test for comparisons between three groups. Wilcoxon test was used for

469 comparison between time point A and C in the longitudinal analyses. Correlation  
470 analysis was performed by Spearman's test, and the best fit line were drawn when  
471 significant. Heatmap analysis was performed P-value < 0.05 (two sided) was  
472 regarded as significant. Data are shown as mean  $\pm$  SE.

473

#### 474 **Data availability**

475 Data are available upon reasonable request to the corresponding author.

476

#### 477 **Acknowledgements**

478 This work is supported in part by funding from Merck Sharp & Dohme Corp., a  
479 subsidiary of Merck & Co., Inc., Kenilworth, NJ, USA, and NIAMS K24 AR066109 to  
480 KHC and from the Lupus Research Alliance, Burroughs Wellcome Fund Career  
481 Award in Medical Sciences, Doris Duke Charitable Foundation Clinical Scientist  
482 Development Award, NIAMS K08 AR072791 to DAR, and NIAMS P30 AR070253 to  
483 JAL and DAR.

484

#### 485 **Disclosures**

486 Dr Costenbader reports personal fees (<\$10,000) and research support from Merck,  
487 Amgen, Astra Zeneca, Eli Lilly, Exagen Diagnostics, Gilead, Glaxo Smith Kline,  
488 Janssen and Neutrolis. Dr. Rao reports personal fees from Pfizer, Janssen, Merck,  
489 Scipher Medicine, GlaxoSmithKline, and Bristol-Myers Squibb (<\$10,000), grant  
490 support from Merck related to the submitted work, and grant support from  
491 Bristol-Myers Squib and Janssen outside the submitted work. In addition, Dr. Rao is  
492 co-inventor on a patent on Tph cells pending. Drs. Alves and Qu are employees of  
493 Merck Sharp & Dohme Corp., a subsidiary of Merck & Co., Inc., Kenilworth, NJ, USA.

494 Dr. Wang was an employee of Merck Sharp & Dohme Corp., a subsidiary of Merck &  
495 Co., Inc., Kenilworth, NJ, USA during participation in this manuscript.

496

#### 497 **Reference**

- 498 1. Choi MY, Barber MR, Barber CE, Clarke AE, Fritzler MJ. Preventing the  
499 development of SLE: identifying risk factors and proposing pathways for clinical care.  
500 Lupus. 2016 Jul;25(8):838-49. doi: 10.1177/0961203316640367. PMID: 27252260.
- 501 2. Amsden LB, Davidson PT, Fevrier HB, Goldfien R, Herrinton LJ. Improving  
502 the quality of care and patient experience of care during the diagnosis of lupus: a  
503 qualitative study of primary care. Lupus. 2018 Jun;27(7):1088-1099. doi:  
504 10.1177/0961203318763082. Epub 2018 Mar 16. PMID: 29546773.
- 505 3. Kernder A, Richter JG, Fischer-Betz R, Winkler-Rohlfing B, Brinks R, Aringer  
506 M, Schneider M, Chehab G. Delayed diagnosis adversely affects outcome in  
507 systemic lupus erythematosus: Cross sectional analysis of the LuLa cohort. Lupus.  
508 2021 Mar;30(3):431-438. doi: 10.1177/0961203320983445. Epub 2021 Jan 5.  
509 PMID: 33402036; PMCID: PMC7933718.
- 510 4. Mosca M, Costenbader KH, Johnson SR, Lorenzoni V, Sebastiani GD, Hoyer  
511 BF, Navarra S, Bonfa E, Ramsey-Goldman R, Medina-Rosas J, Piga M, Tani C,  
512 Tedeschi SK, Dörner T, Aringer M, Touma Z. Brief Report: How Do Patients With  
513 Newly Diagnosed Systemic Lupus Erythematosus Present? A Multicenter Cohort of  
514 Early Systemic Lupus Erythematosus to Inform the Development of New  
515 Classification Criteria. Arthritis Rheumatol. 2019 Jan;71(1):91-98. doi:  
516 10.1002/art.40674. Epub 2018 Nov 26. PMID: 30035365.
- 517 5. Arazi A, Rao DA, Berthier CC, Davidson A, Liu Y, Hoover PJ, Chicoine A,  
518 Eisenhaure TM, Jonsson AH, Li S, Lieb DJ, Zhang F, Slowikowski K, Browne EP,

519 Noma A, Sutherby D, Steelman S, Smilek DE, Tosta P, Apruzzese W, Massarotti E,  
520 Dall'Era M, Park M, Kamen DL, Furie RA, Payan-Schober F, Pendergraft WF 3rd,  
521 McInnis EA, Buyon JP, Petri MA, Putterman C, Kalunian KC, Woodle ES, Lederer  
522 JA, Hildeman DA, Nusbaum C, Raychaudhuri S, Kretzler M, Anolik JH, Brenner MB,  
523 Wofsy D, Hachohen N, Diamond B; Accelerating Medicines Partnership in SLE  
524 network. The immune cell landscape in kidneys of patients with lupus nephritis. *Nat*  
525 *Immunol.* 2019 Jul;20(7):902-914. doi: 10.1038/s41590-019-0398-x. Epub 2019 Jun  
526 17. Erratum in: *Nat Immunol.* 2019 Aug 13;: PMID: 31209404; PMCID:  
527 PMC6726437.

528 6. Der E, Suryawanshi H, Morozov P, Kustagi M, Goilav B, Ranabothu S, Izmirly  
529 P, Clancy R, Belmont HM, Koenigsberg M, Mokrzycki M, Rominieki H, Graham JA,  
530 Rocca JP, Bornkamp N, Jordan N, Schulte E, Wu M, Pullman J, Slowikowski K,  
531 Raychaudhuri S, Guthridge J, James J, Buyon J, Tuschl T, Putterman C;  
532 Accelerating Medicines Partnership Rheumatoid Arthritis and Systemic Lupus  
533 Erythematosus (AMP RA/SLE) Consortium. Tubular cell and keratinocyte single-cell  
534 transcriptomics applied to lupus nephritis reveal type I IFN and fibrosis relevant  
535 pathways. *Nat Immunol.* 2019 Jul;20(7):915-927. doi: 10.1038/s41590-019-0386-1.  
536 Epub 2019 May 20. Erratum in: *Nat Immunol.* 2019 Nov;20(11):1556. PMID:  
537 31110316; PMCID: PMC6584054.

538 7. Banchereau R, Hong S, Cantarel B, Baldwin N, Baisch J, Edens M, Cepika  
539 AM, Acs P, Turner J, Anguiano E, Vinod P, Kahn S, Obermoser G, Blankenship D,  
540 Wakeland E, Nassi L, Gotte A, Punaro M, Liu YJ, Banchereau J, Rossello-Urgell J,  
541 Wright T, Pascual V. Personalized Immunomonitoring Uncovers Molecular  
542 Networks that Stratify Lupus Patients. *Cell.* 2016 Apr 21;165(3):551-65. doi:

- 543 10.1016/j.cell.2016.03.008. Epub 2016 Mar 31. Erratum in: Cell. 2016 Jun  
544 2;165(6):1548-1550. PMID: 27040498; PMCID: PMC5426482.
- 545 8. Hong S, Banchereau R, Maslow BL, Guerra MM, Cardenas J, Baisch J,  
546 Branch DW, Porter TF, Sawitzke A, Laskin CA, Buyon JP, Merrill J, Sammaritano LR,  
547 Petri M, Gatewood E, Cepika AM, Ohouo M, Obermoser G, Anguiano E, Kim TW,  
548 Nulsen J, Nehar-Belaid D, Blankenship D, Turner J, Banchereau J, Salmon JE,  
549 Pascual V. Longitudinal profiling of human blood transcriptome in healthy and lupus  
550 pregnancy. J Exp Med. 2019 May 6;216(5):1154-1169. doi: 10.1084/jem.20190185.  
551 Epub 2019 Apr 8. PMID: 30962246; PMCID: PMC6504211.
- 552 9. Amir el-AD, Davis KL, Tadmor MD, Simonds EF, Levine JH, Bendall SC,  
553 Shenfeld DK, Krishnaswamy S, Nolan GP, Pe'er D. viSNE enables visualization of  
554 high dimensional single-cell data and reveals phenotypic heterogeneity of leukemia.  
555 Nat Biotechnol. 2013 Jun;31(6):545-52. doi: 10.1038/nbt.2594. Epub 2013 May 19.  
556 PMID: 23685480; PMCID: PMC4076922.
- 557 10. Van Gassen S, Callebaut B, Van Helden MJ, Lambrecht BN, Demeester P,  
558 Dhaene T, Saeys Y. FlowSOM: Using self-organizing maps for visualization and  
559 interpretation of cytometry data. Cytometry A. 2015 Jul;87(7):636-45. doi:  
560 10.1002/cyto.a.22625. Epub 2015 Jan 8. PMID: 25573116.
- 561 11. Bocharnikov AV, Keegan J, Wacleche VS, Cao Y, Fonseka CY, Wang G,  
562 Muise ES, Zhang KX, Arazi A, Keras G, Li ZJ, Qu Y, Gurish MF, Petri M, Buyon JP,  
563 Putterman C, Wofsy D, James JA, Guthridge JM, Diamond B, Anolik JH, Mackey MF,  
564 Alves SE, Nigrovic PA, Costenbader KH, Brenner MB, Lederer JA, Rao DA;  
565 Accelerating Medicines Partnership (AMP) RA/SLE Network. PD-1hiCXCR5- T  
566 peripheral helper cells promote B cell responses in lupus via MAF and IL-21. JCI

- 567 Insight. 2019 Oct 17;4(20):e130062. doi: 10.1172/jci.insight.130062. PMID:  
568 31536480; PMCID: PMC6824311.
- 569 12. O'Gorman WE, Kong DS, Balboni IM, Rudra P, Bolen CR, Ghosh D, Davis  
570 MM, Nolan GP, Hsieh EW. Mass cytometry identifies a distinct monocyte cytokine  
571 signature shared by clinically heterogeneous pediatric SLE patients. *J Autoimmun.*  
572 2017 Apr 4:S0896-8411(16)30412-7. doi: 10.1016/j.jaut.2017.03.010. Epub ahead  
573 of print. PMID: 28389038; PMCID: PMC5628110.
- 574 13. van der Kroef M, van den Hoogen LL, Mertens JS, Blokland SLM, Haskett S,  
575 Devaprasad A, Carvalheiro T, Chouri E, Vazirpanah N, Cossu M, Wichers CGK,  
576 Silva-Cardoso SC, Affandi AJ, Bekker CPJ, Lopes AP, Hillen MR, Bonte-Mineur F,  
577 Kok MR, Beretta L, Rossato M, Mingueneau M, van Roon JAG, Radstake TRDJ.  
578 Cytometry by time of flight identifies distinct signatures in patients with systemic  
579 sclerosis, systemic lupus erythematosus and Sjögrens syndrome. *Eur J Immunol.*  
580 2020 Jan;50(1):119-129. doi: 10.1002/eji.201948129. Epub 2019 Sep 11. PMID:  
581 31424086.
- 582 14. Blanco P, Ueno H, Schmitt N. T follicular helper (Tfh) cells in lupus: Activation  
583 and involvement in SLE pathogenesis. *Eur J Immunol.* 2016 Feb;46(2):281-90. doi:  
584 10.1002/eji.201545760. PMID: 26614103.
- 585 15. van Vollenhoven RF, Hahn BH, Tsokos GC, Wagner CL, Lipsky P, Touma Z,  
586 Werth VP, Gordon RM, Zhou B, Hsu B, Chevrier M, Triebel M, Jordan JL, Rose S.  
587 Efficacy and safety of ustekinumab, an IL-12 and IL-23 inhibitor, in patients with  
588 active systemic lupus erythematosus: results of a multicentre, double-blind, phase 2,  
589 randomised, controlled study. *Lancet.* 2018 Oct 13;392(10155):1330-1339. doi:  
590 10.1016/S0140-6736(18)32167-6. Epub 2018 Sep 21. PMID: 30249507.



- 591 16. Arbuckle MR, McClain MT, Rubertone MV, Scofield RH, Dennis GJ, James  
592 JA, Harley JB. Development of autoantibodies before the clinical onset of systemic  
593 lupus erythematosus. *N Engl J Med*. 2003 Oct 16;349(16):1526-33. doi:  
594 10.1056/NEJMoa021933. PMID: 14561795.
- 595 17. Rao DA, Gurish MF, Marshall JL, Slowikowski K, Fonseka CY, Liu Y, Donlin  
596 LT, Henderson LA, Wei K, Mizoguchi F, Teslovich NC, Weinblatt ME, Massarotti EM,  
597 Coblyn JS, Helfgott SM, Lee YC, Todd DJ, Bykerk VP, Goodman SM, Pernis AB,  
598 Ivashkiv LB, Karlson EW, Nigrovic PA, Filer A, Buckley CD, Lederer JA,  
599 Raychaudhuri S, Brenner MB. Pathologically expanded peripheral T helper cell  
600 subset drives B cells in rheumatoid arthritis. *Nature*. 2017 Feb 1;542(7639):110-114.  
601 doi: 10.1038/nature20810. PMID: 28150777; PMCID: PMC5349321.
- 602 18. Yoshitomi H, Ueno H. Shared and distinct roles of T peripheral helper and T  
603 follicular helper cells in human diseases. *Cell Mol Immunol*. 2021 Mar;18(3):523-527.  
604 doi: 10.1038/s41423-020-00529-z. Epub 2020 Aug 31. PMID: 32868910; PMCID:  
605 PMC8027819.
- 606 19. Rao DA. T Cells That Help B Cells in Chronically Inflamed Tissues. *Front*  
607 *Immunol*. 2018 Aug 23;9:1924. doi: 10.3389/fimmu.2018.01924. PMID: 30190721;  
608 PMCID: PMC6115497.
- 609 20. Bashford-Rogers RJM, Bergamaschi L, McKinney EF, Pombal DC, Mescia F,  
610 Lee JC, Thomas DC, Flint SM, Kellam P, Jayne DRW, Lyons PA, Smith KGC.  
611 Analysis of the B cell receptor repertoire in six immune-mediated diseases. *Nature*.  
612 2019 Oct;574(7776):122-126. doi: 10.1038/s41586-019-1595-3. Epub 2019 Sep 25.  
613 PMID: 31554970; PMCID: PMC6795535.

- 614 21. Lycke NY, Bemark M. The regulation of gut mucosal IgA B-cell responses:  
615 recent developments. *Mucosal Immunol.* 2017 Nov;10(6):1361-1374. doi:  
616 10.1038/mi.2017.62. Epub 2017 Jul 26. PMID: 28745325.
- 617 22. Klemsz MJ, McKercher SR, Celada A, Van Beveren C, Maki RA. The  
618 macrophage and B cell-specific transcription factor PU.1 is related to the ets  
619 oncogene. *Cell.* 1990 Apr 6;61(1):113-24. doi: 10.1016/0092-8674(90)90219-5.  
620 PMID: 2180582.
- 621 23. Wang R, Singaraju A, Marks KE, Shakib L, Dunlap G, Cunningham-Bussel A,  
622 Chen L, Tirpack A, Fein MR, Todd DJ, MacFarlane L, Goodman SM, DiCarlo EF,  
623 Massarotti EM, Sparks JA, Hamnvik OPR, Min L, Jonsson AH, Brenner MB, Chan  
624 KK, Bass AR, Donlin LT, Rao DA. Clonally expanded CD38hi cytotoxic CD8 T cells  
625 define the T cell infiltrate in checkpoint inhibitor-associated arthritis
- 626 24. Schmitt N, Liu Y, Bentebibel SE, Munagala I, Bourdery L, Venuprasad K,  
627 Banchereau J, Ueno H. The cytokine TGF- $\beta$  co-opts signaling via STAT3-STAT4 to  
628 promote the differentiation of human TFH cells. *Nat Immunol.* 2014  
629 Sep;15(9):856-65. doi: 10.1038/ni.2947. Epub 2014 Jul 27. PMID: 25064073;  
630 PMCID: PMC4183221.
- 631 25. Locci M, Wu JE, Arumemi F, Mikulski Z, Dahlberg C, Miller AT, Crotty S.  
632 Activin A programs the differentiation of human TFH cells. *Nat Immunol.* 2016  
633 Aug;17(8):976-84. doi: 10.1038/ni.3494. Epub 2016 Jul 4. Erratum in: *Nat Immunol.*  
634 2016 Sep 20;17(10):1235. PMID: 27376469; PMCID: PMC4955732.
- 635 26. Morand EF, Furie R, Tanaka Y, Bruce IN, Askanase AD, Richez C, Bae SC,  
636 Brohawn PZ, Pineda L, Berglind A, Tummala R; TULIP-2 Trial Investigators. Trial of  
637 Anifrolumab in Active Systemic Lupus Erythematosus. *N Engl J Med.* 2020 Jan

638 16;382(3):211-221. doi: 10.1056/NEJMoa1912196. Epub 2019 Dec 18. PMID:

639 31851795.

640 27. Hochberg MC. Updating the American College of Rheumatology revised  
641 criteria for the classification of systemic lupus erythematosus. *Arthritis Rheum.* 1997  
642 Sep;40(9):1725. doi: 10.1002/art.1780400928. PMID: 9324032.

643 28. Finck R, Simonds EF, Jager A, Krishnaswamy S, Sachs K, Fantl W, Pe'er D,  
644 Nolan GP, Bendall SC. Normalization of mass cytometry data with bead standards.  
645 *Cytometry A.* 2013 May;83(5):483-94. doi: 10.1002/cyto.a.22271. Epub 2013 Mar 19.  
646 PMID: 23512433; PMCID: PMC3688049.

647 29. Zunder ER, Finck R, Behbehani GK, Amir el-AD, Krishnaswamy S, Gonzalez  
648 VD, Lorang CG, Bjornson Z, Spitzer MH, Bodenmiller B, Fantl WJ, Pe'er D, Nolan  
649 GP. Palladium-based mass tag cell barcoding with a doublet-filtering scheme and  
650 single-cell deconvolution algorithm. *Nat Protoc.* 2015 Feb;10(2):316-33. doi:  
651 10.1038/nprot.2015.020. Epub 2015 Jan 22. PMID: 25612231; PMCID:  
652 PMC4347881.

653

## 654 **Figure legends**

655 **Figure 1. Overview of immunophenotyping early SLE using cross-sectional**  
656 **and longitudinal samples.** (A) PBMCs were acquired from 14 controls, nine early  
657 SLE, and 15 established SLE and profiled with three different mass cytometry  
658 panels. (B) For the nine early SLE patients, longitudinal PBMC and serum samples  
659 were collected reflecting three timepoints: at enrollment (time A), six months after  
660 enrollment (time B), and 12 months after enrollment (time C). Immune cell frequency  
661 was assessed with mass cytometry and serum cytokines were assessed by Luminex  
662 cytokines assay. (C) Immunophenotyping panel mass cytometry data from nine

663 early SLE and 15 established SLE were merged and visualized with tSNE plots.  
664 Frequencies of labelled immune cell types were compared between controls, early  
665 SLE, and established SLE cohorts by Kruskal-Wallis with Dunn's test of multiple  
666 comparisons. \*P<0.05, \*\*P<0.01, \*\*\*P<0.001. Data are shown as mean  $\pm$  SE.

667

668 **Figure 2. Expanded Ki67<sup>+</sup> ICOS<sup>+</sup> CD8 T cells in early SLE.** (A) Abundance (% of  
669 total CD8 T cells) of FlowSOM metaclusters of CD8<sup>+</sup> T cells in 14 controls, nine early  
670 SLE and 15 established SLE. Kruskal-Wallis with Dunn's test was used for  
671 comparisons. (B) Heatmap of normalized expression of mass cytometry markers in  
672 each metacluster. Markers with average of metacluster medians > 0.2 are shown.  
673 (C) tSNE visualization of CD8 T cells from nine early SLE patients. The orange  
674 circle: Ki67<sup>+</sup> ICOS<sup>+</sup> CD8 cells. (D) Representative gating for Ki67<sup>+</sup> ICOS<sup>+</sup> CD8 T cell  
675 population in CD3<sup>+</sup>CD14<sup>-</sup>CD4<sup>-</sup>CD8<sup>+</sup> cells, and the comparison between 14 controls,  
676 nine early SLE, and 15 established SLE. (E) Longitudinal changes of Ki67<sup>+</sup> ICOS<sup>+</sup>  
677 CD8 T cell frequency in early SLE at enrollment (time A), six months after enrollment  
678 (time B), and 12 months after enrollment (time C). Wilcoxon log-rank test to compare  
679 between A and C was used for p-value calculation. (F) Longitudinal changes of  
680 disease activity by SLEDAI in early SLE patients as in (E). \*P<0.05, \*\*P<0.01,  
681 \*\*\*P<0.001. Data are shown as mean  $\pm$  SE.

682

683 **Figure 3. Distinct longitudinal changes of Tph cells and Tfh cells in early SLE.**  
684 (A) Abundance (% of total CD4 T cells) of FlowSOM metaclusters of CD4<sup>+</sup> T cells in  
685 14 controls, nine early SLE and 15 established SLE. Kruskal-Wallis with Dunn's  
686 multiple test was used for comparisons. (B) Heatmap of normalized expression of  
687 mass cytometry markers in each metacluster. Markers with average of metacluster

688 medians > 0.2 are shown. (C) tSNE visualization of CD4 T cells in nine early SLE  
689 patients. The orange circle: Tfh cells, the green circle: Tph cells, the grey circle:  
690 Ki67<sup>hi</sup> cells Treg cells. (D, E) Representative gating for Tph cells, Tfh cells, and Ki67<sup>hi</sup>  
691 Treg in CD3<sup>+</sup>CD14<sup>-</sup>CD4<sup>+</sup>CD8<sup>-</sup>CD45RO<sup>+</sup> memory CD4 T cells, and the comparison  
692 between 14 controls, nine early SLE, and 15 established SLE. Kruskal-Wallis with  
693 Dunn's multiple test was used for comparisons. (F) Longitudinal changes of Tph  
694 cells, Tfh cells, and Ki67<sup>+</sup> Treg cell in early SLE at enrollment (time A), six months  
695 after enrollment (time B), and 12 months after enrollment (time C). Wilcoxon log-rank  
696 test to compare between A and C was used for calculation of p-value. (G)  
697 Correlation between prednisone dose and Tfh cell frequency in 27 datapoints (nine  
698 early SLE patients x three timepoints each). Spearman statistics shown. (H) Tfh  
699 frequency in early SLE patients with or without MMF treatment as in (G) (n=27 data  
700 points). Mann-Whitney U test was used for the comparison. \*P<0.05, \*\*P<0.01,  
701 \*\*\*P<0.001. Data are shown as mean ± SE.

702

703 **Figure 4. Expanded ABCs and plasmablasts in early SLE patients.**

704 (A) Abundance (% of total B cells) of FlowSOM metaclusters of B cells in 14 controls,  
705 nine early SLE and 15 established SLE. Kruskal-Wallis with Dunn's multiple test was  
706 used for comparisons. (B) Heatmap of normalized expression of mass cytometry  
707 markers in each metacluster. Markers with average of metacluster medians > 0.2  
708 are shown. (C) tSNE visualization of CD19<sup>+</sup> B cells in nine early SLE patients. The  
709 orange circle: CD19<sup>int</sup> Ki67<sup>hi</sup> plasmablasts, the green circle: ABCs. (D-F)  
710 Representative gating for CD19<sup>int</sup> Ki67<sup>hi</sup> plasmablasts, ABCs, and IgM<sup>+</sup> IgD<sup>+</sup> ABCs in  
711 CD19<sup>+</sup>CD14<sup>-</sup> B cells, and the comparison between 14 controls, nine early SLE, and  
712 15 established SLE. Kruskal-Wallis with Dunn's multiple test was used for

713 comparisons. (G) Proportion of IgG<sup>+</sup> and IgA<sup>+</sup> cells in CD19<sup>int</sup> Ki67<sup>hi</sup> plasmablasts  
714 and ABCs in nine early SLE and 15 established SLE patients. Wilcoxon  
715 matched-pair signed rank test was used for the comparison. (H) Longitudinal  
716 changes of IgG<sup>+</sup> CD19<sup>int</sup> Ki67<sup>hi</sup> plasmablasts, IgA<sup>+</sup> CD19<sup>int</sup> Ki67<sup>hi</sup> plasmablasts, IgG<sup>+</sup>  
717 ABCs, and IgA<sup>+</sup> ABCs in early SLE at enrollment (time A), six months after  
718 enrollment (time B), and 12 months after enrollment (time C). Wilcoxon matched-pair  
719 signed rank test to compare between A and C was used for calculation of P value.  
720 \*P<0.05, \*\*P<0.01, \*\*\*P<0.001. Data are shown as mean ± SE.

721

722 **Figure 5. PU.1<sup>hi</sup> Ki67<sup>hi</sup> monocytes were expanded in early SLE.**

723 (A) Abundance (% of total monocytes) of FlowSOM metaclusters of monocytes in 14  
724 controls, nine early SLE and 15 established SLE. Kruskal-Wallis with Dunn's  
725 multiple test was used for comparisons. Kruskal-Wallis with Dunn's multiple test was  
726 used for comparisons. (B) Heatmap of normalized expression of mass cytometry  
727 markers in each metacluster. Expression of PU.1, CD69, Ki67, CCR2, CD14,  
728 HLA-DR, CD16 are shown. (C) tSNE visualization of CD14 monocytes in nine early  
729 SLE. The orange circle: PU.1<sup>hi</sup> Ki67<sup>hi</sup> monocytes. (D) correlation of metacluster 13  
730 with HLA-DR<sup>-</sup> Ki67<sup>hi</sup> monocytes and PU.1<sup>hi</sup> Ki67<sup>hi</sup> monocytes. Spearman correlation  
731 statistics shown. Solid line represents line of best fit. (E) Representative gating for  
732 PU.1<sup>hi</sup> Ki67<sup>hi</sup> monocytes and the comparison between 14 controls, nine early SLE,  
733 and 15 established SLE. Kruskal-Wallis with Dunn's multiple test was used for  
734 comparisons. (F) CCR2 expression on PU.1<sup>hi</sup> Ki67<sup>hi</sup> monocytes and PU.1<sup>low</sup> Ki67<sup>low</sup>  
735 monocytes (nine early SLE and 15 established SLE). (G) Longitudinal changes of  
736 PU.1<sup>hi</sup> Ki67<sup>hi</sup> monocytes in 9 early SLE at enrollment (time A), six months after  
737 enrollment (time B), and 12 months after enrollment (time C). Wilcoxon log-rank test

738 to compare between A and C was used for calculation of P value. \*P<0.05, \*\*P<0.01,  
739 \*\*\*P<0.001. Data are shown as mean  $\pm$  SE.

740

741 **Figure 6. Association of Tph, Tfh, and Ki67 proliferative immune cells in early**  
742 **SLE.**

743 (A) Representative gating for NKG2D<sup>+</sup> Ki67<sup>+</sup> NK cells and the comparison between  
744 14 controls, nine early SLE, and 15 established SLE. Kruskal-Wallis with Dunn's  
745 multiple test was used for comparisons. (B) Longitudinal changes of NKG2D<sup>+</sup> Ki67<sup>+</sup>  
746 NK cells in nine early SLE patients at enrollment (time A), six months after  
747 enrollment (time B), and 12 months after enrollment (time C). Wilcoxon log-rank test  
748 to compare between A and C was used for calculation of P value. (C) tSNE  
749 visualization of NKG2D<sup>+</sup> Ki67<sup>+</sup> NK cells in 14 controls, nine early SLE, and 15  
750 established SLE. The orange circle: NKG2D<sup>+</sup> Ki67<sup>+</sup> NK cells. (D) Hierarchical  
751 clustering heatmap with expanded immune cell types in early SLE. 27 data points  
752 from early SLE patients (nine patients x three time points) were used for this analysis.  
753 Correlation coefficients calculated by Spearman's test were used for the heatmap.  
754 (E) Correlation analysis between Tph cells, Tfh cells, ABCs, and CD19<sup>int</sup> Ki67<sup>int</sup>  
755 plasmablasts. 27 early SLE patient data points were used as in (D). Spearman  
756 correlation statistics shown. Solid line represents line of best fit. \*P<0.05, \*\*P<0.01,  
757 \*\*\*P<0.001. Data are shown as mean  $\pm$  SE.

758

759 **Figure 7. Dysregulated cytokine- and chemokine-networks in early SLE.**

760 (A) A hierarchical clustering heatmap with serum cytokines and chemokines in early  
761 SLE patients. 65 cytokines were assessed by Luminex assay, and 33 cytokines  
762 were detected. 27 data points from early SLE patients (nine patients x three time

763 points) were used for this analysis. Correlation coefficients calculated by  
764 Spearman's test were used for the heatmap. (B) Comparison of serum cytokine  
765 levels between nine controls and nine early SLE (time A). 15 cytokines were  
766 significantly different between controls and early SLE (time A). Mann-Whitney U test  
767 was used for the comparison. (C) Longitudinal changes of CXCL10, CD40L, IL-20,  
768 and TWEAK in nine early SLE at enrollment (time A), six months after enrollment  
769 (time B), and 12 months after enrollment (time C). Wilcoxon log-rank test to compare  
770 between A and C was used for calculation of p value. (D) A hierarchical clustering  
771 heatmap with expanded immune cell types and chemokines in early SLE. 27 data  
772 points from early SLE patients (nine patients x three time points) were used for this  
773 analysis. Correlation coefficients calculated by Spearman's test were used for the  
774 heatmap. \*P<0.05, \*\*P<0.01, \*\*\*P<0.001. Data are shown as mean  $\pm$  SE.

775

776 **Figure 8. Dysregulated immune cell types, cytokines, chemokines, and**  
777 **chronological changes in early SLE.** The increase pattern of cell types and  
778 cytokines/chemokines levels at the diagnosis and one year after the diagnosis in  
779 early SLE.

780

781

782

783

784

785

786

787



788

789

790

791

792

793

794

# Figure 1

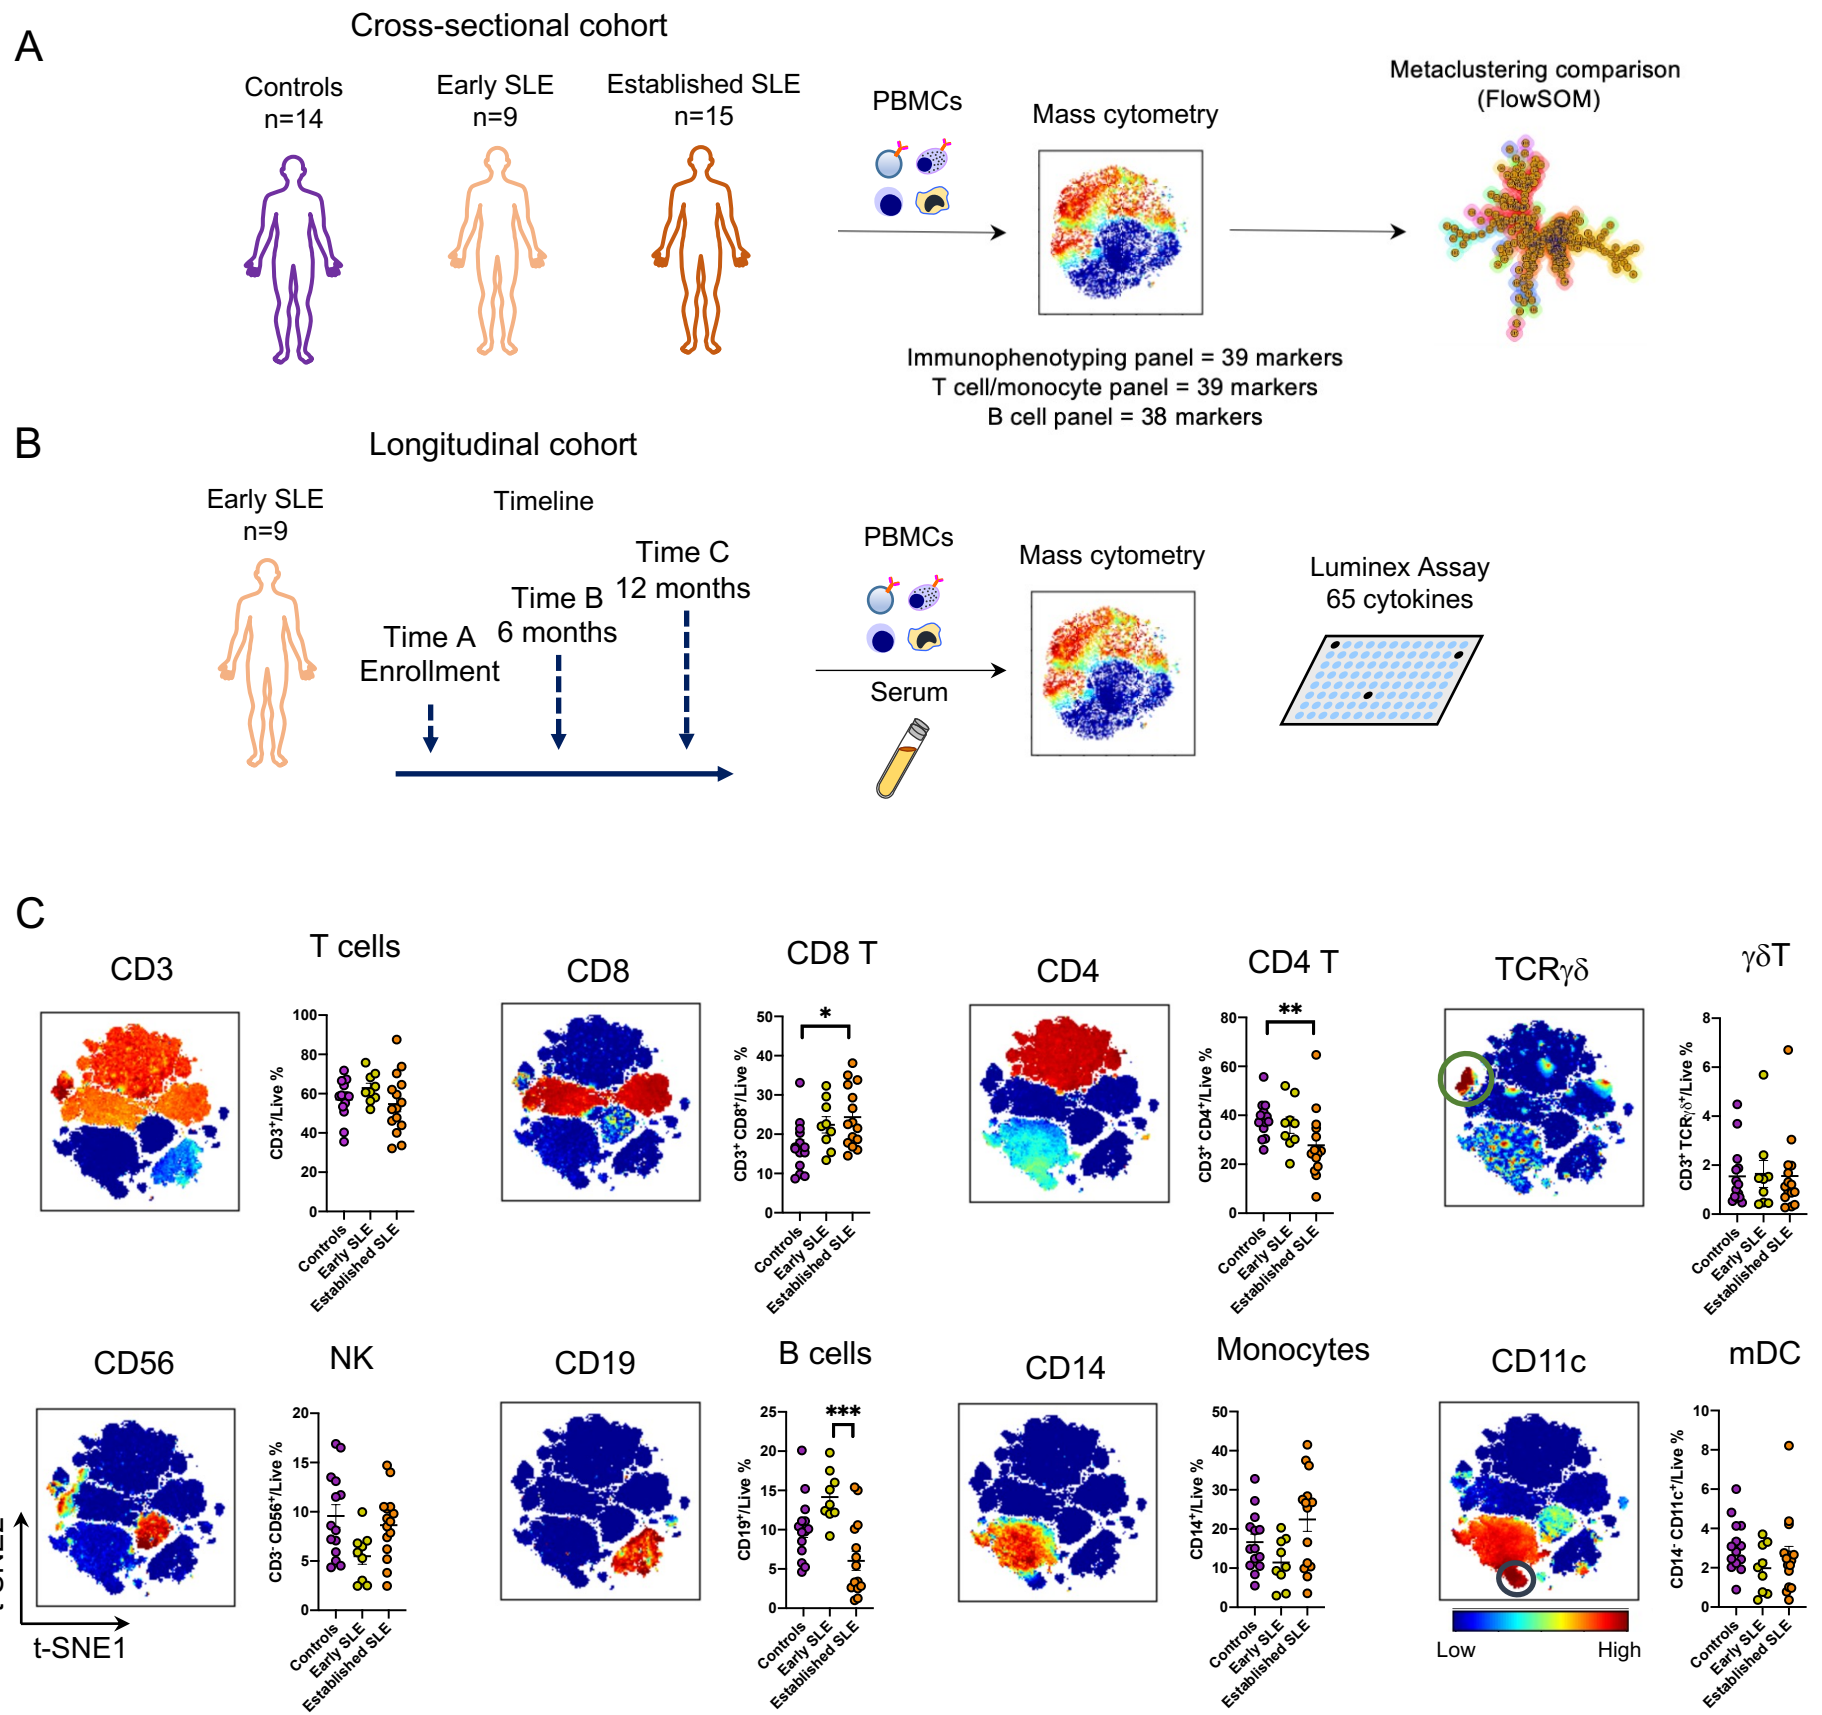

## Figure 2

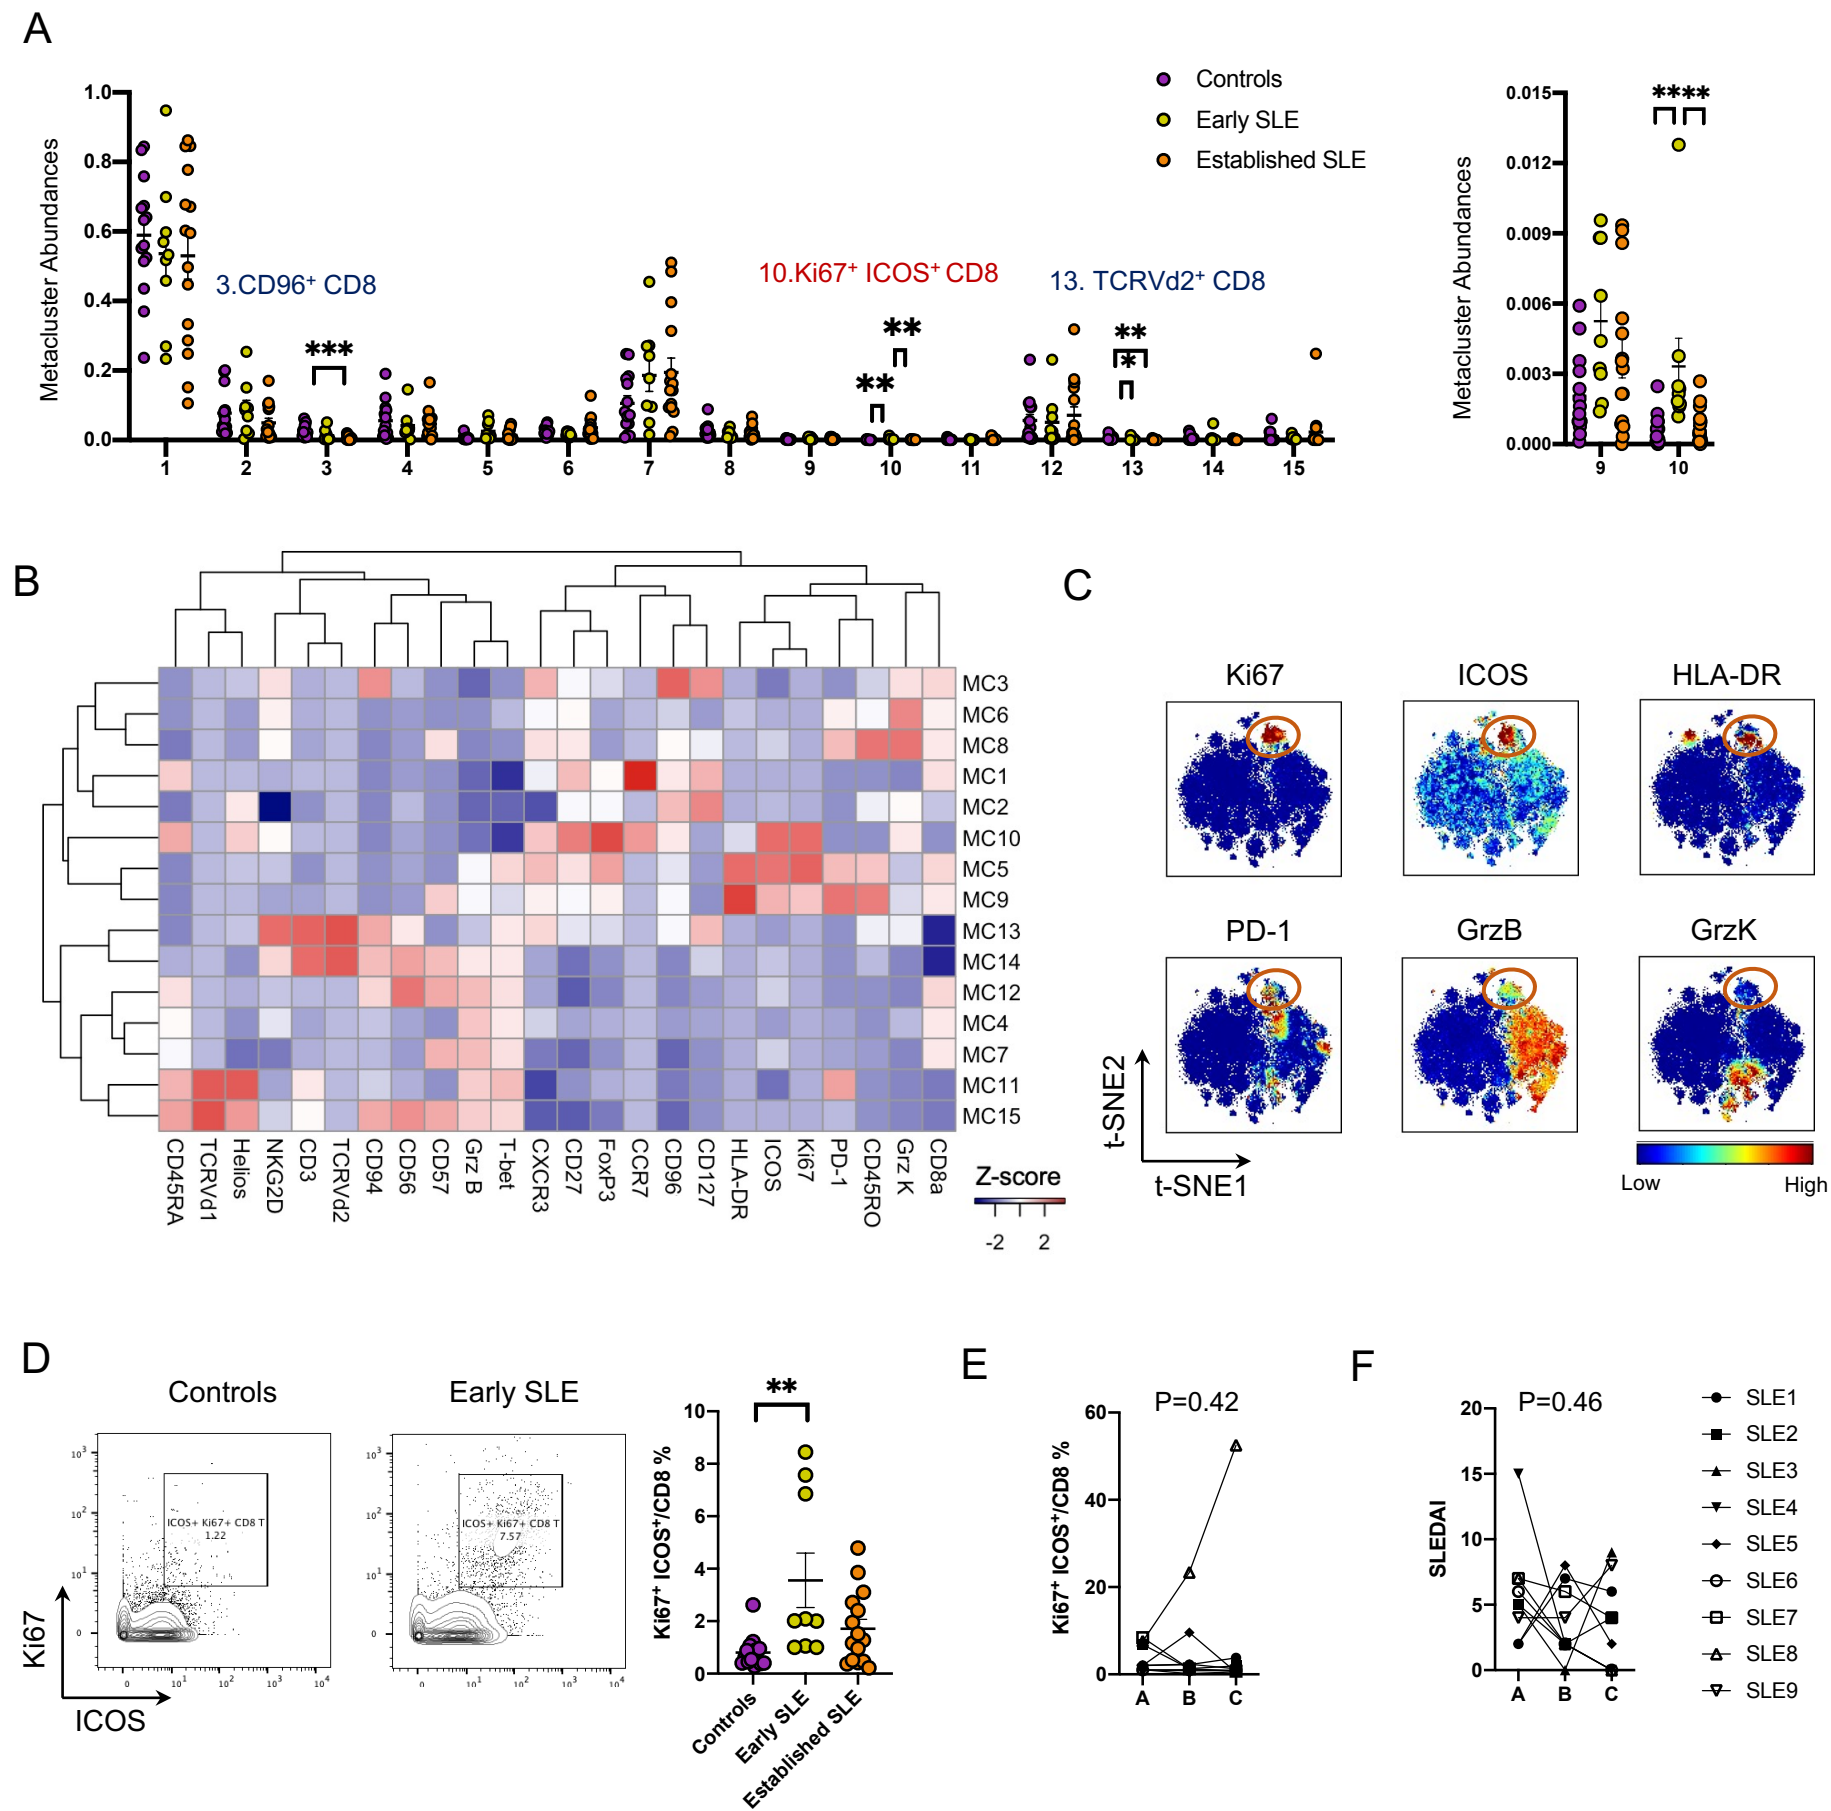

## Figure 3

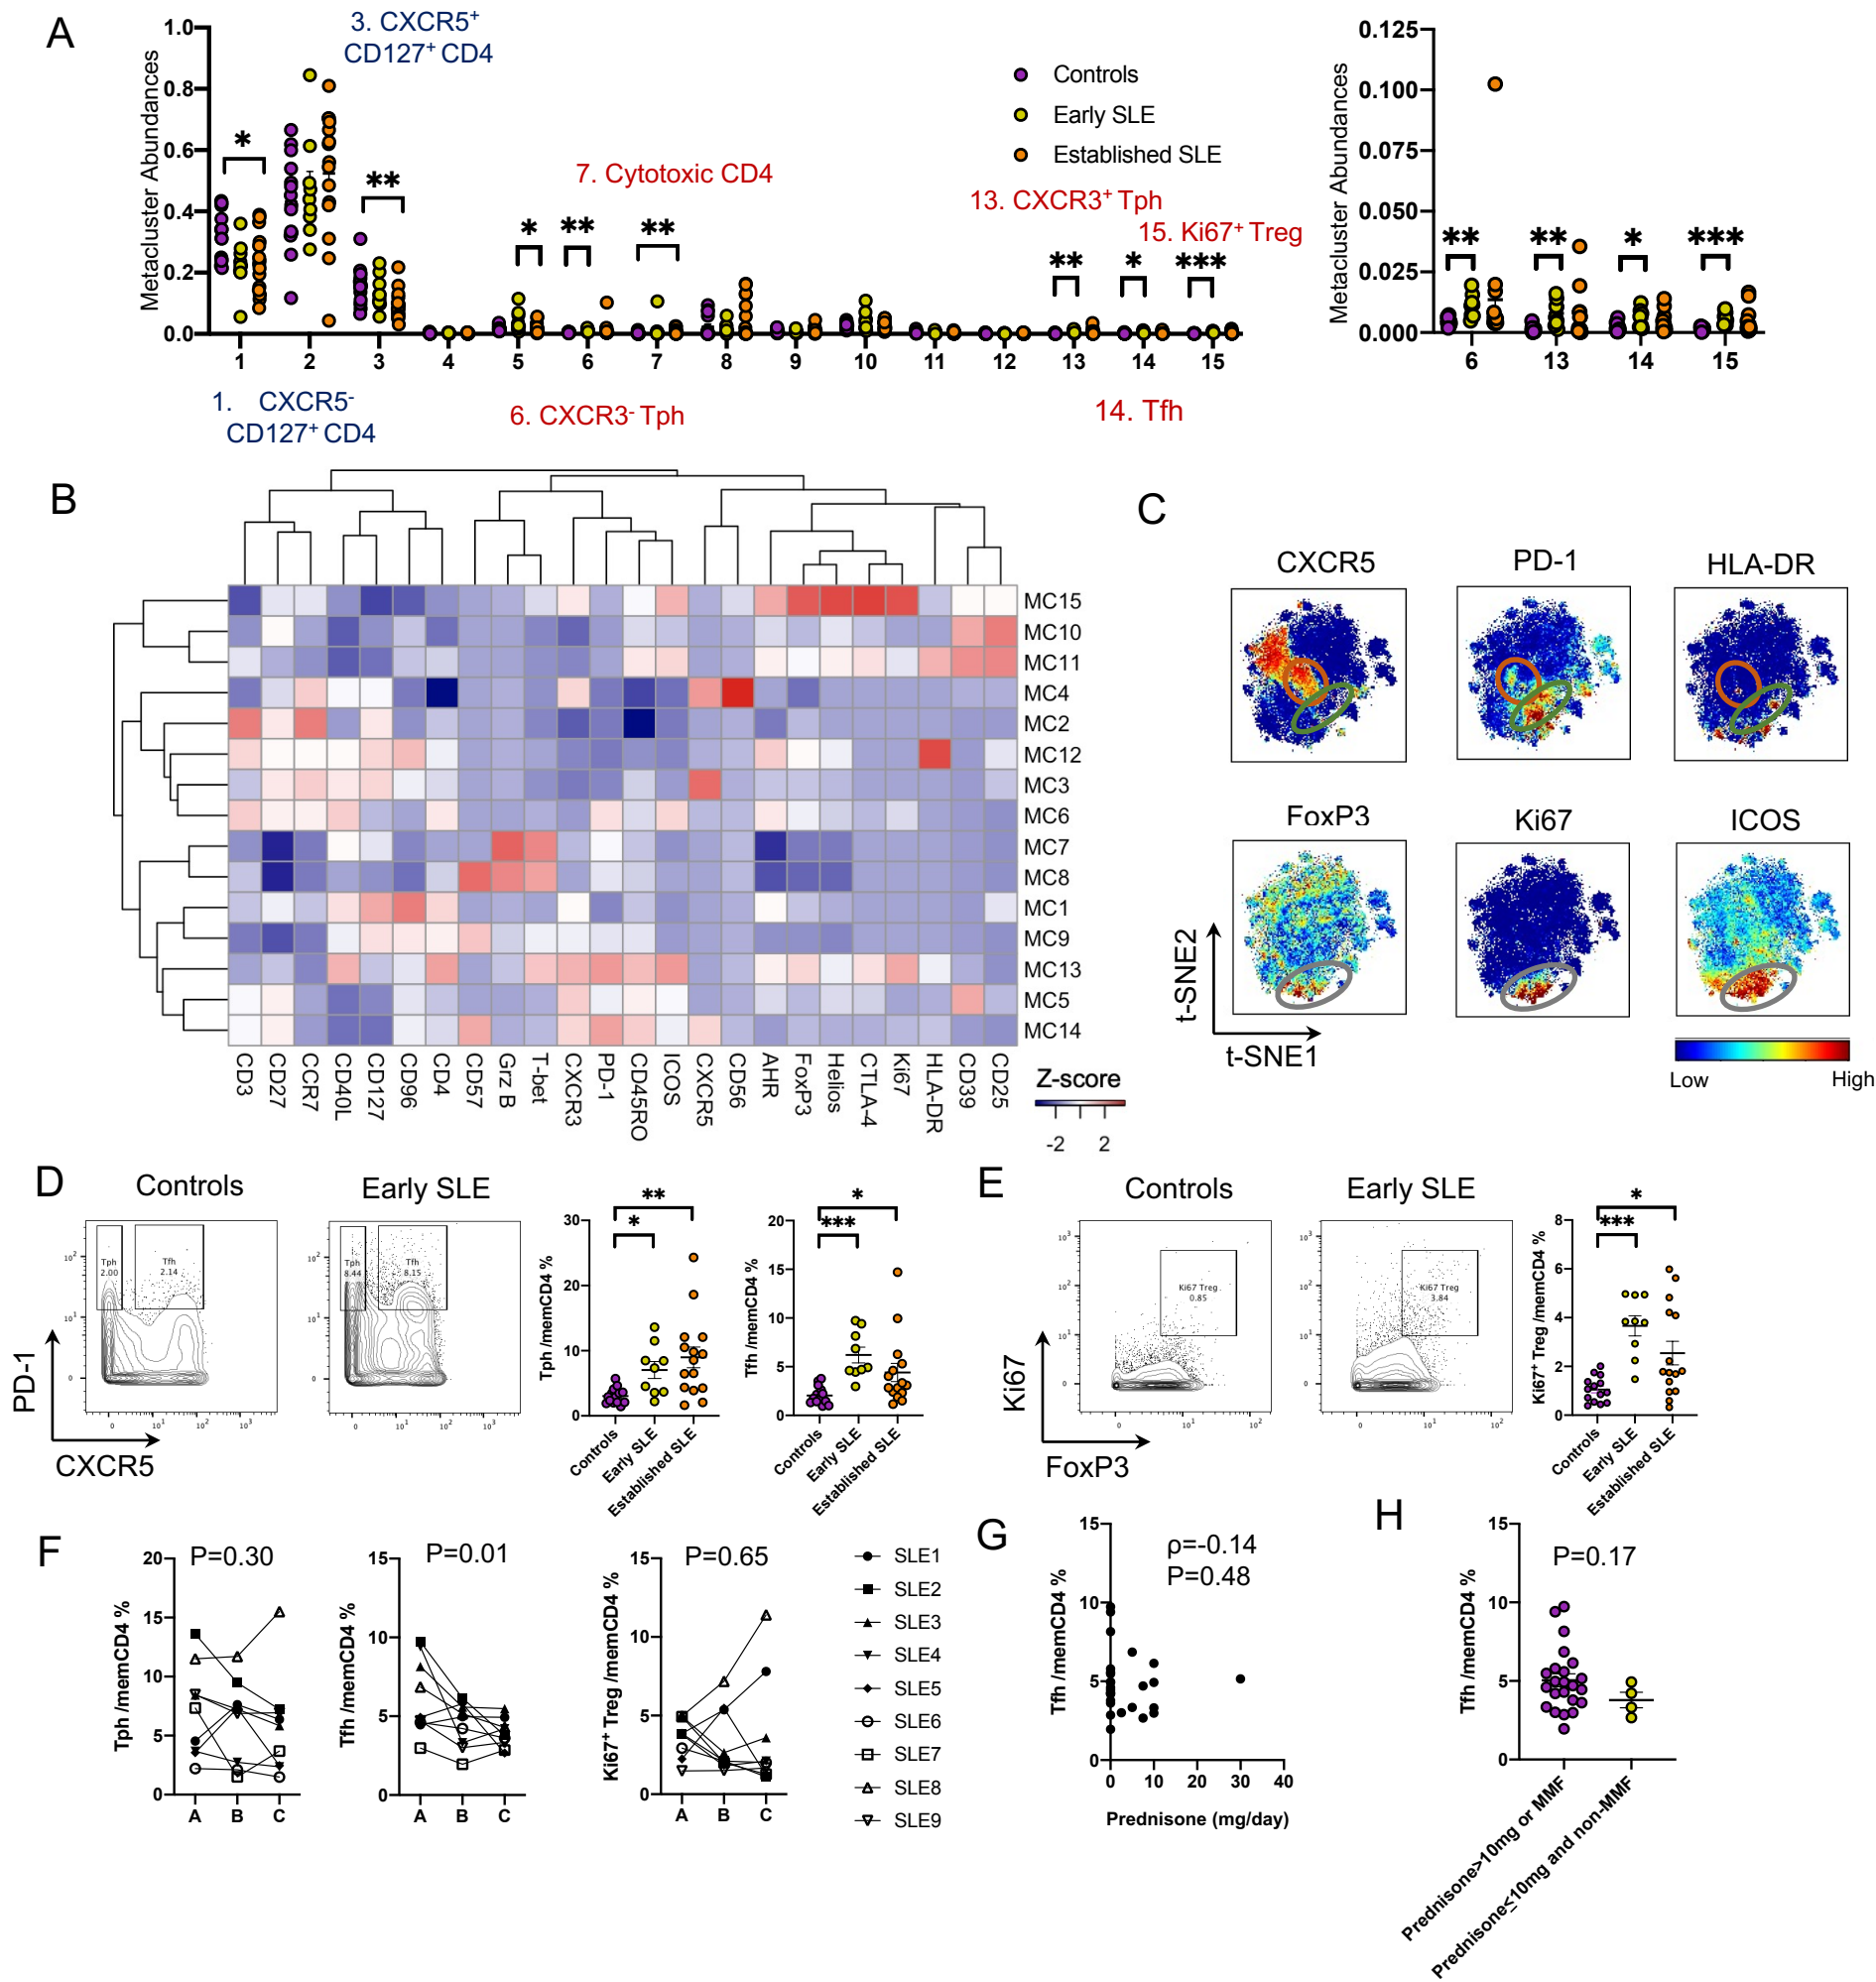

## Figure 4

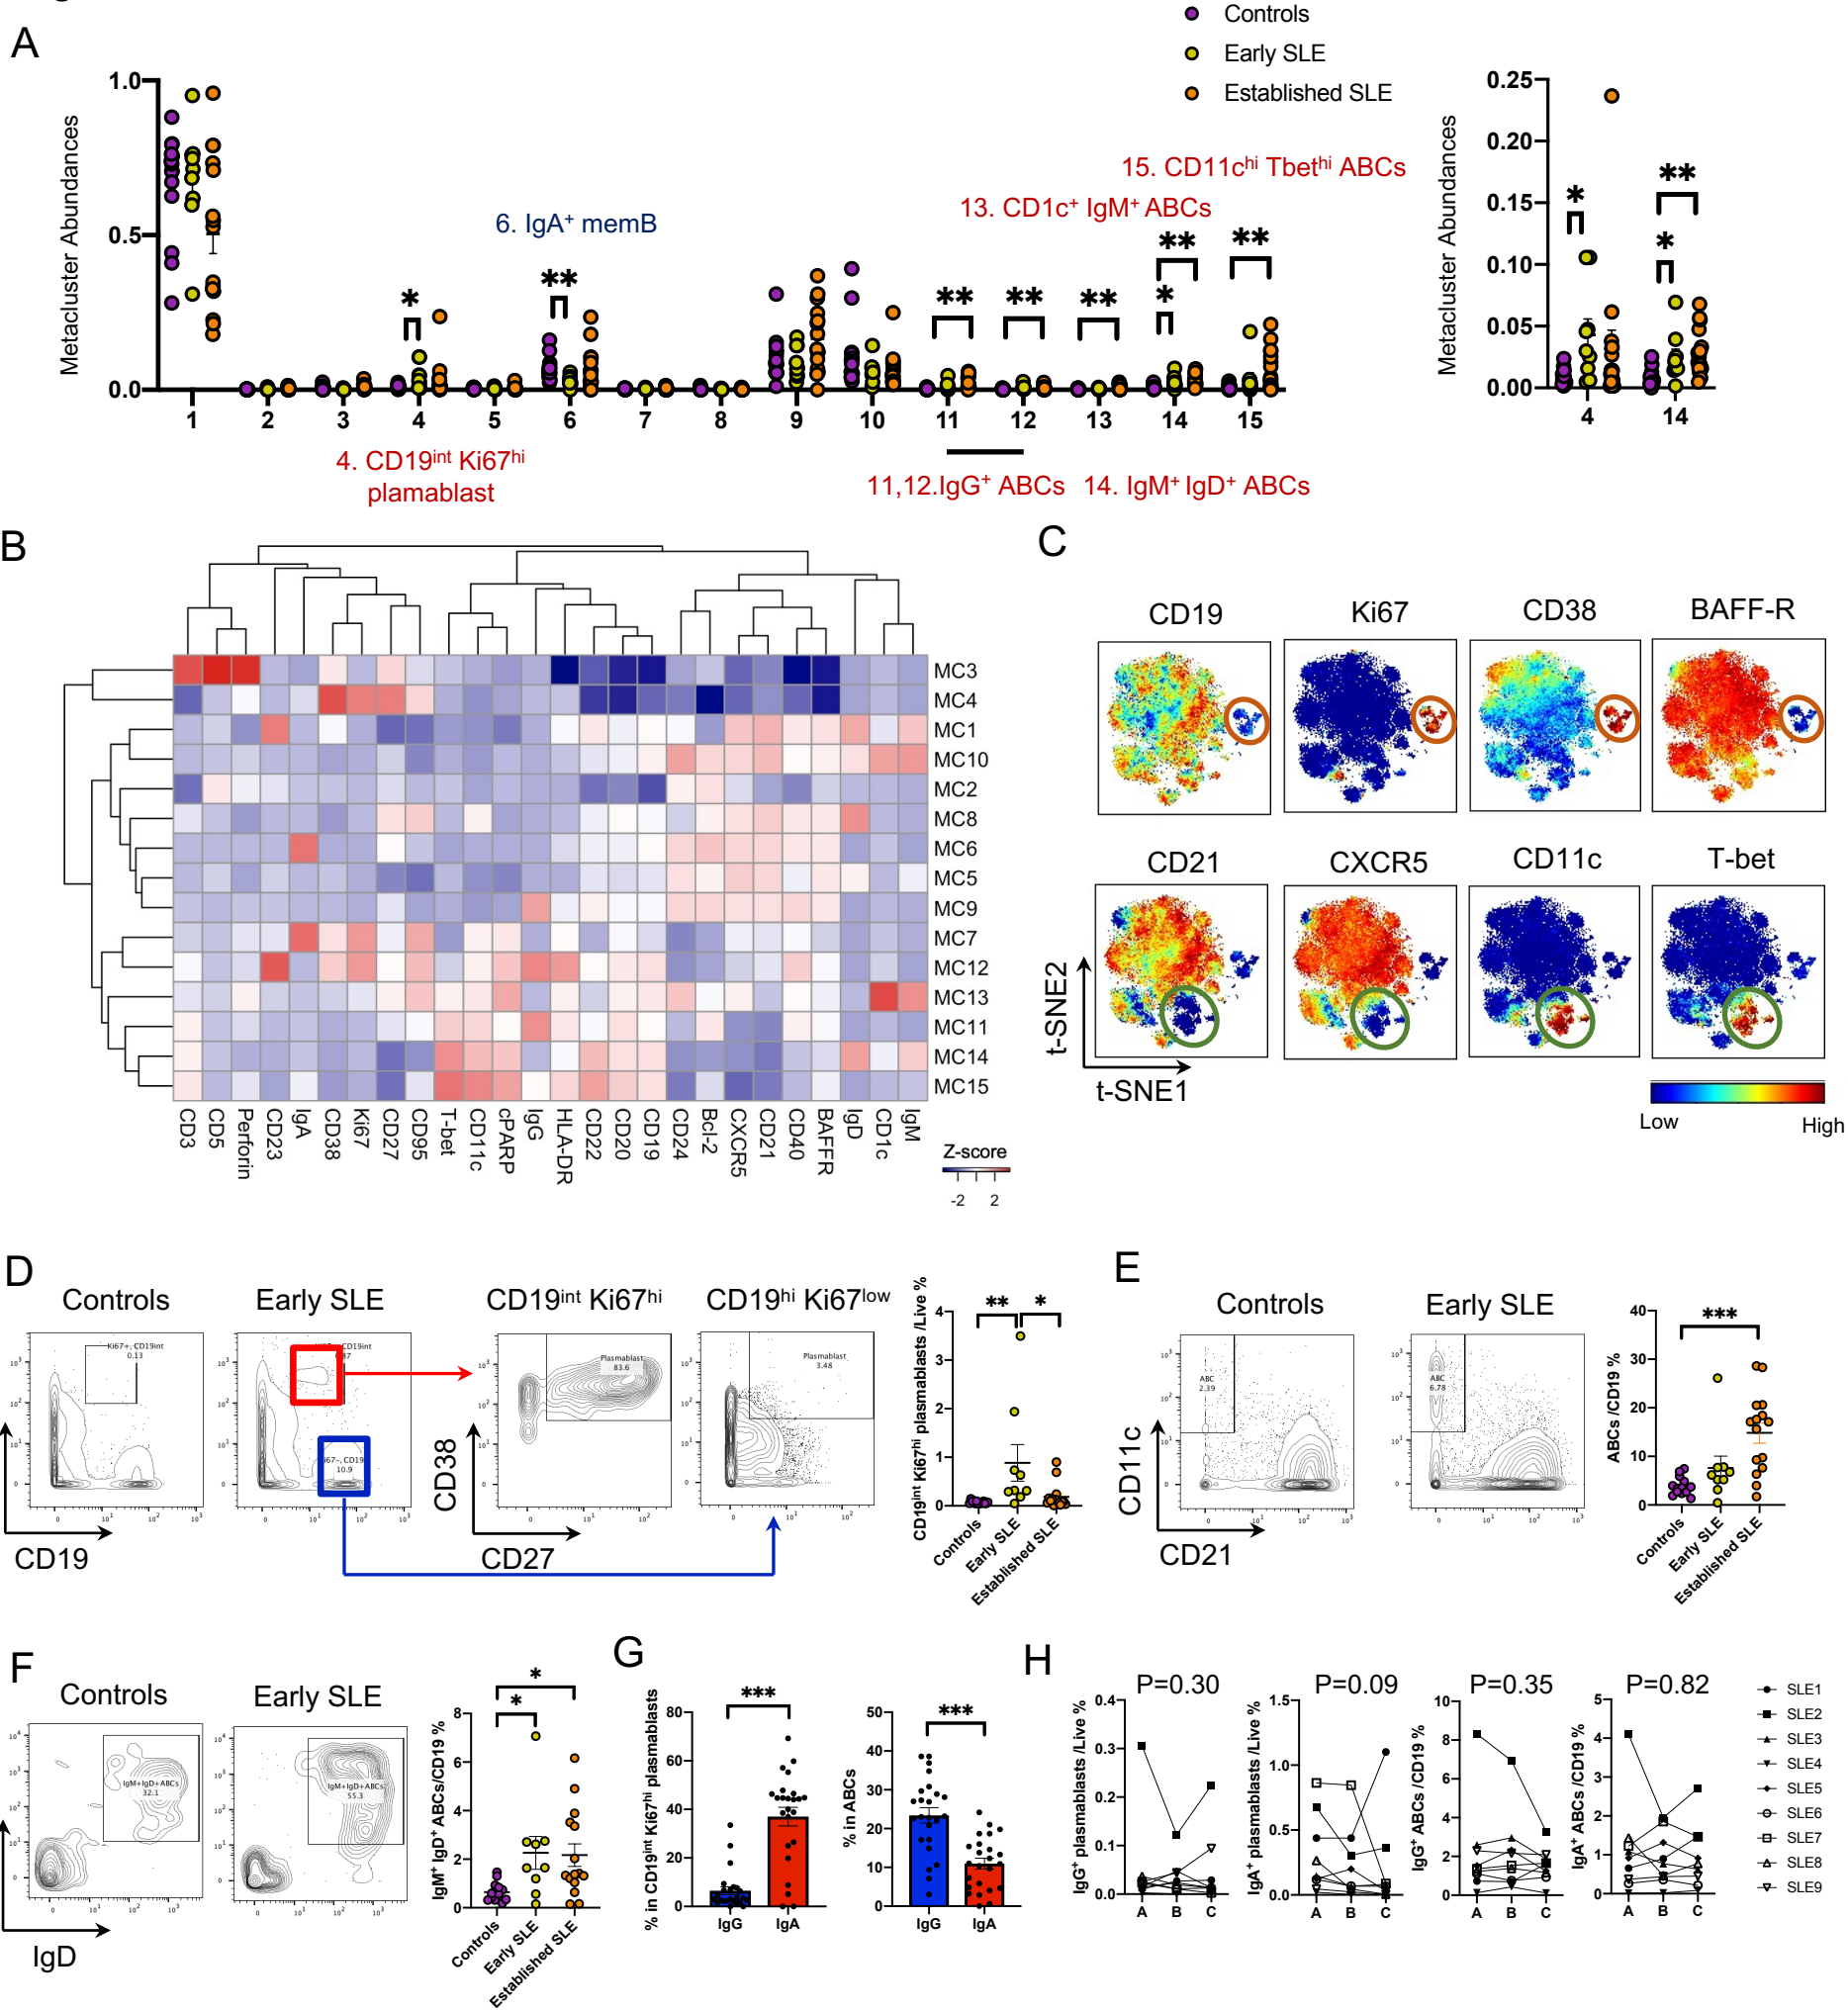

# Figure 5

A

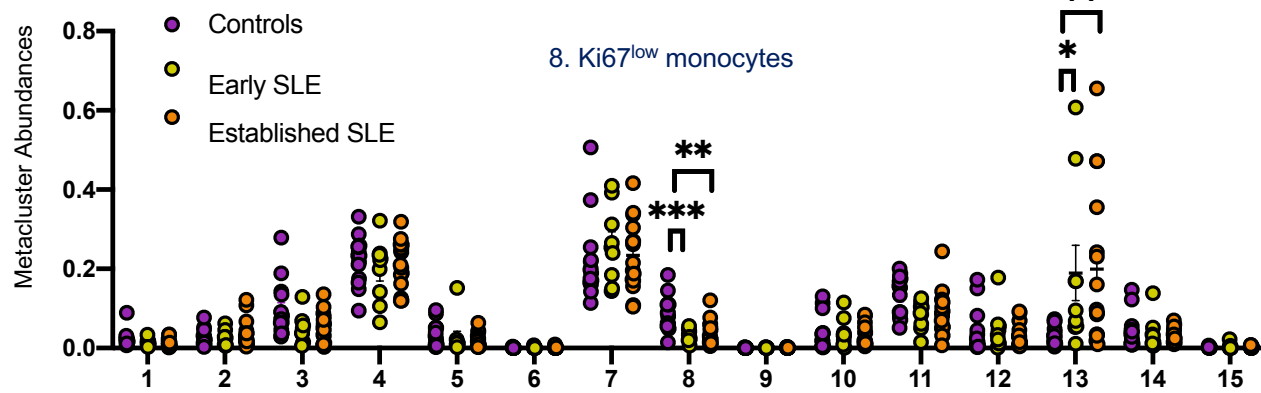

B

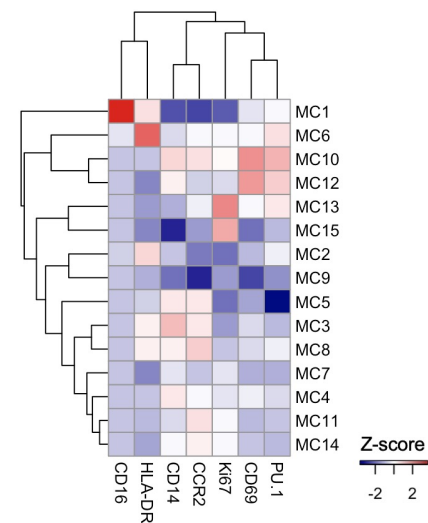

C

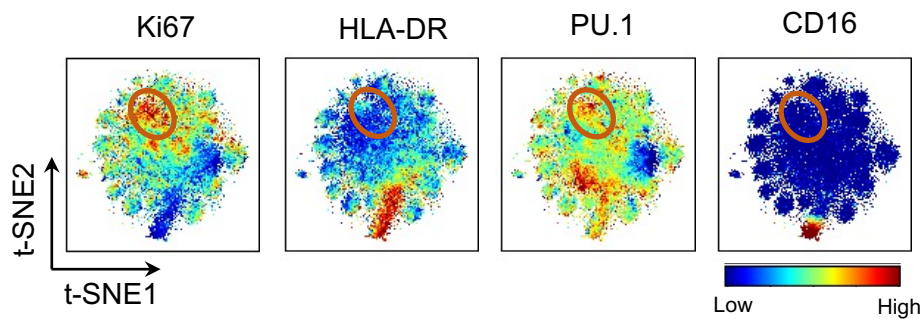

D

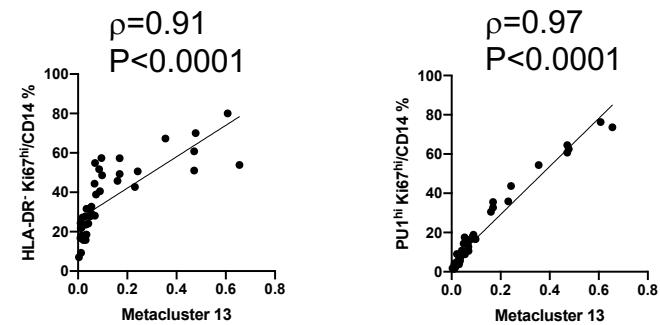

E

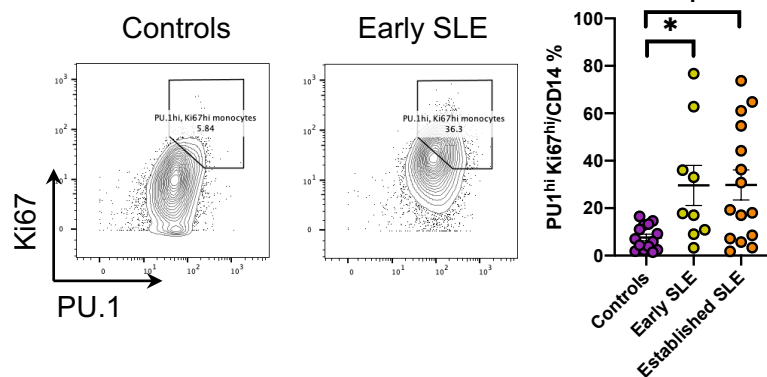

F

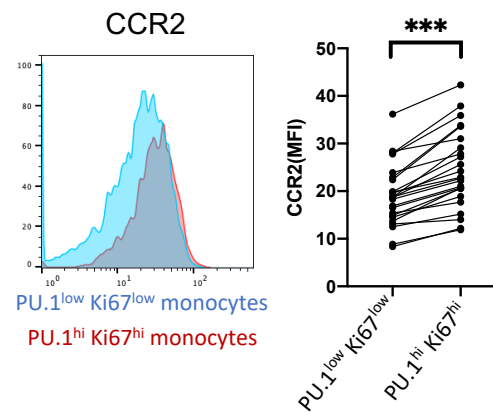

G

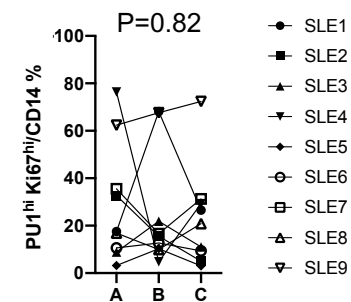

## Figure 6

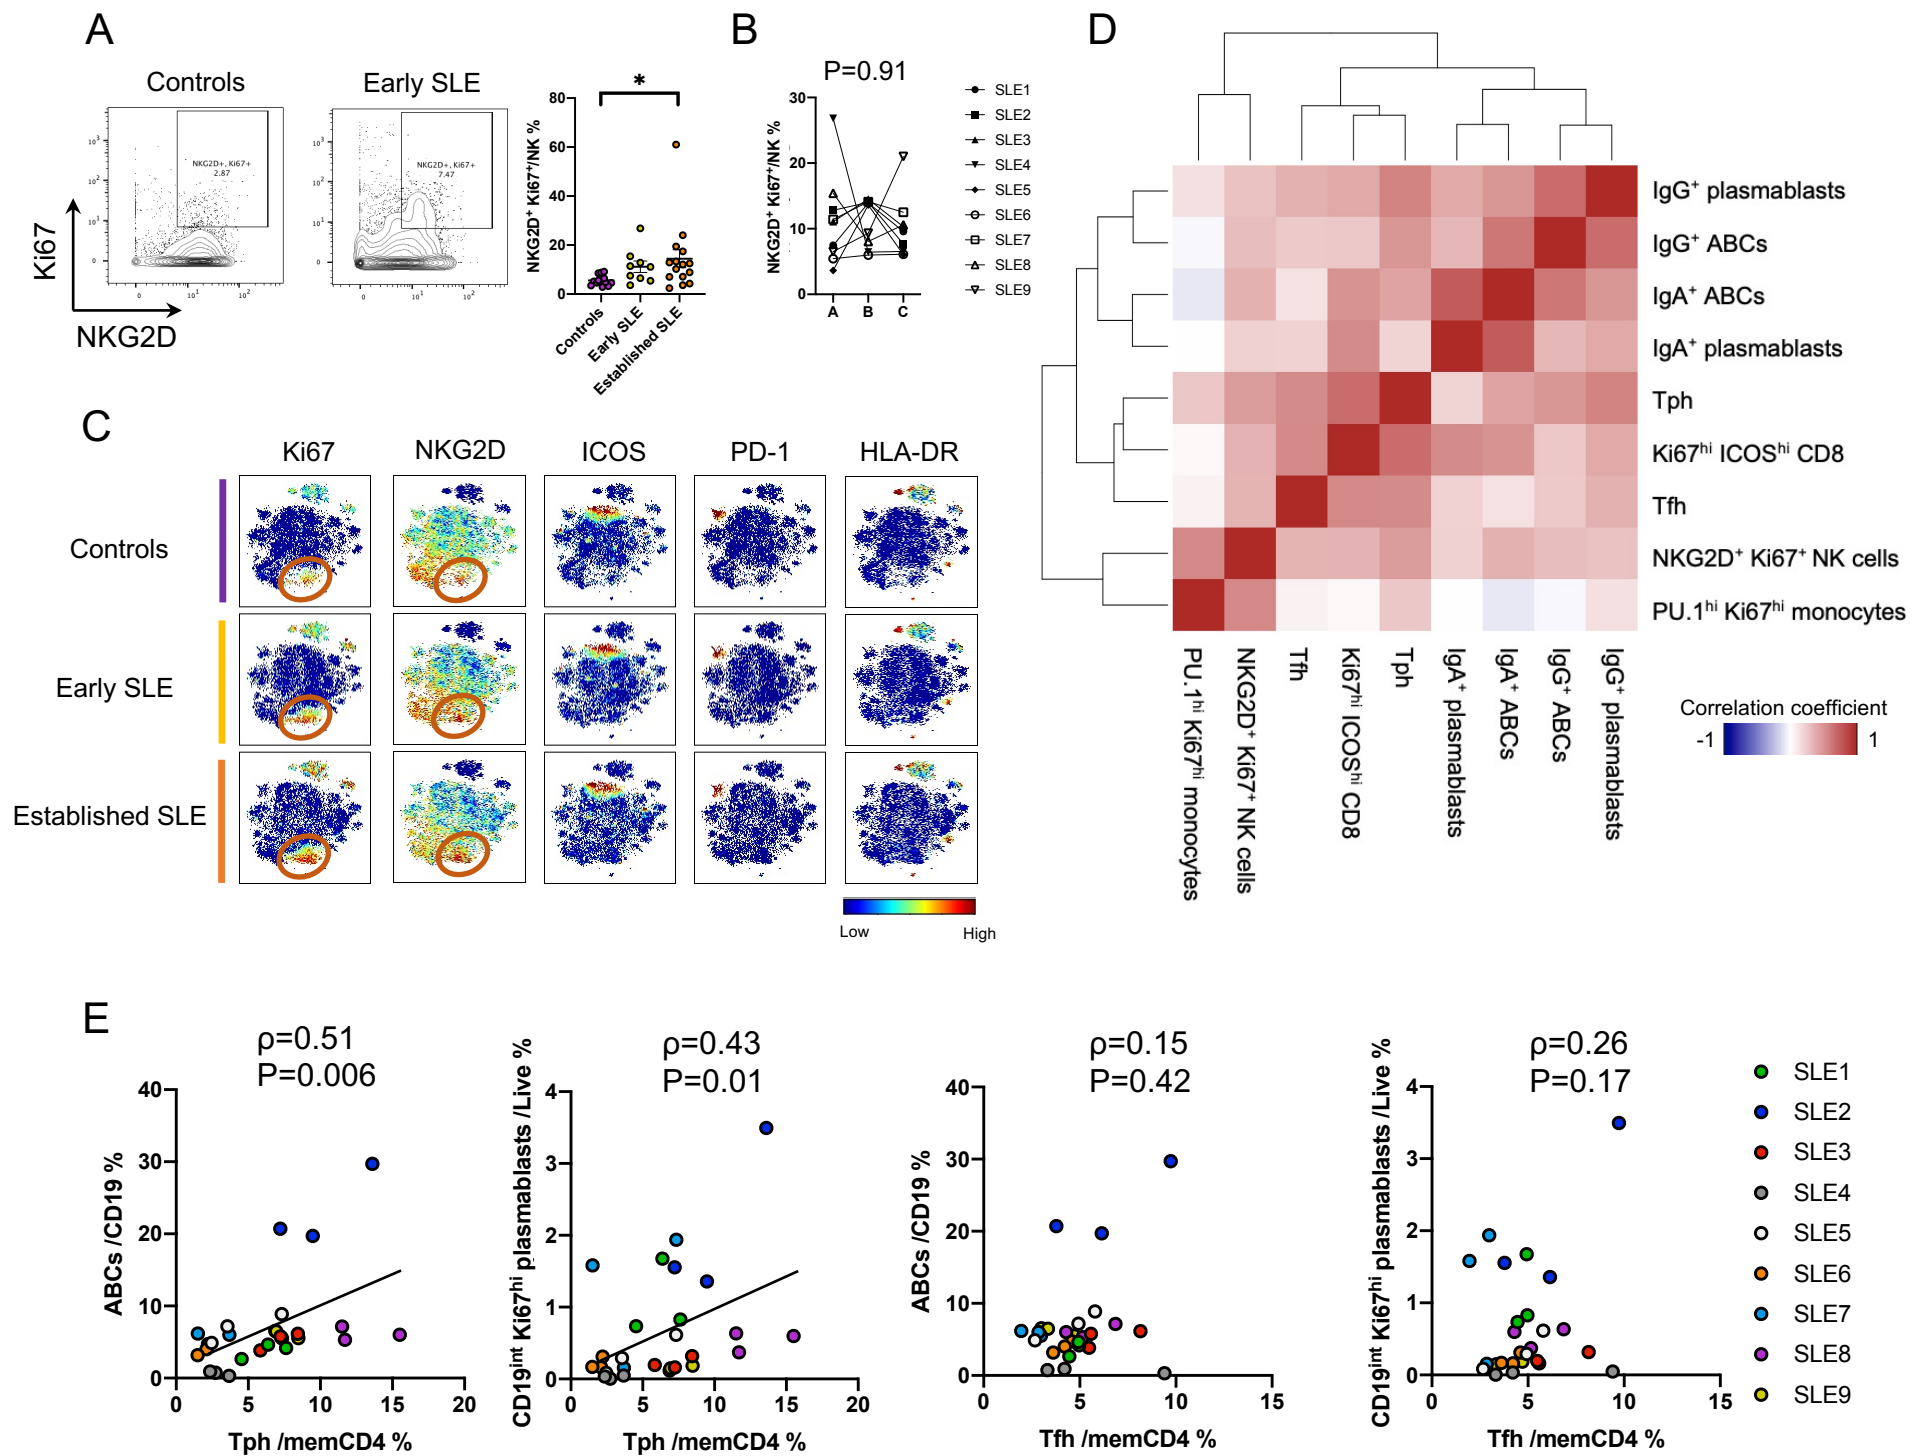

# Figure 7

A

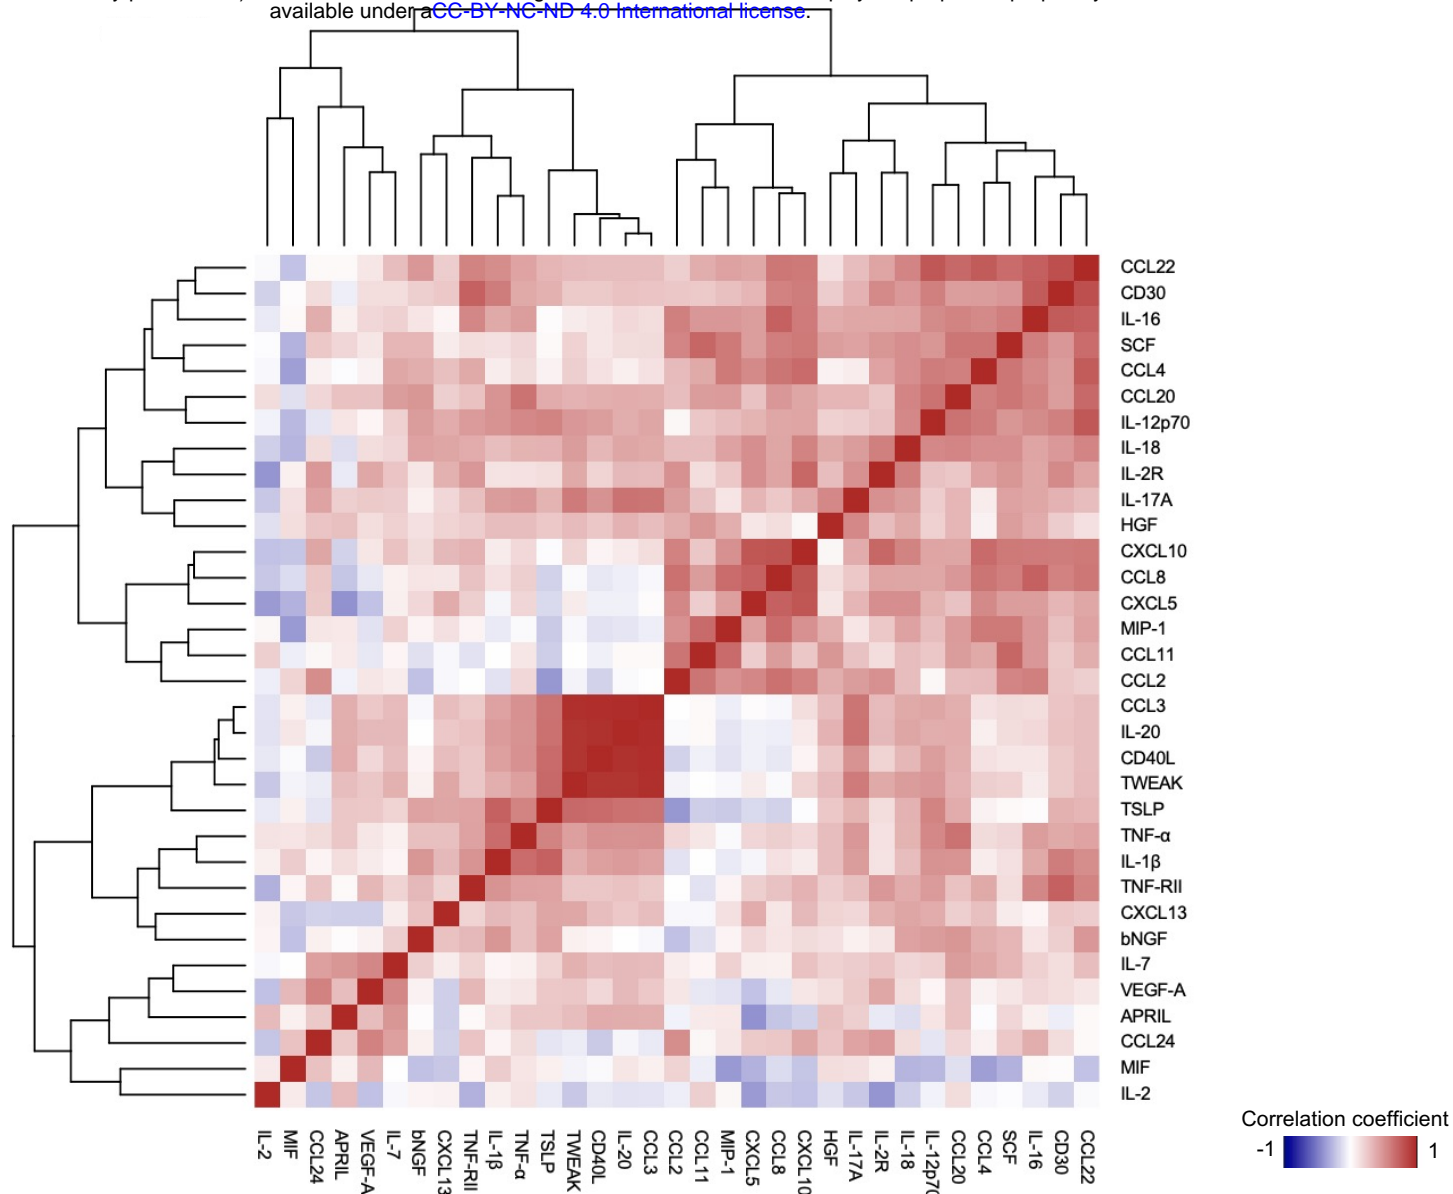

B

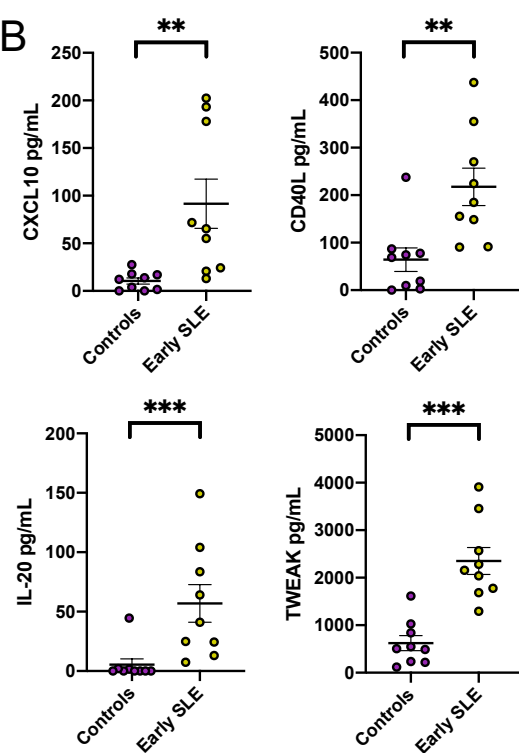

C

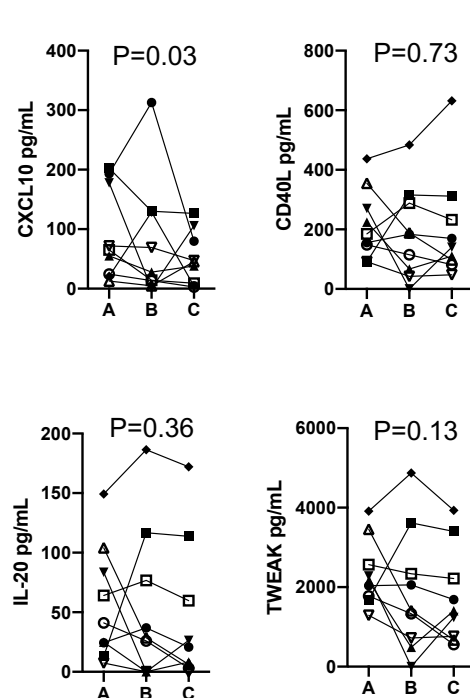

D

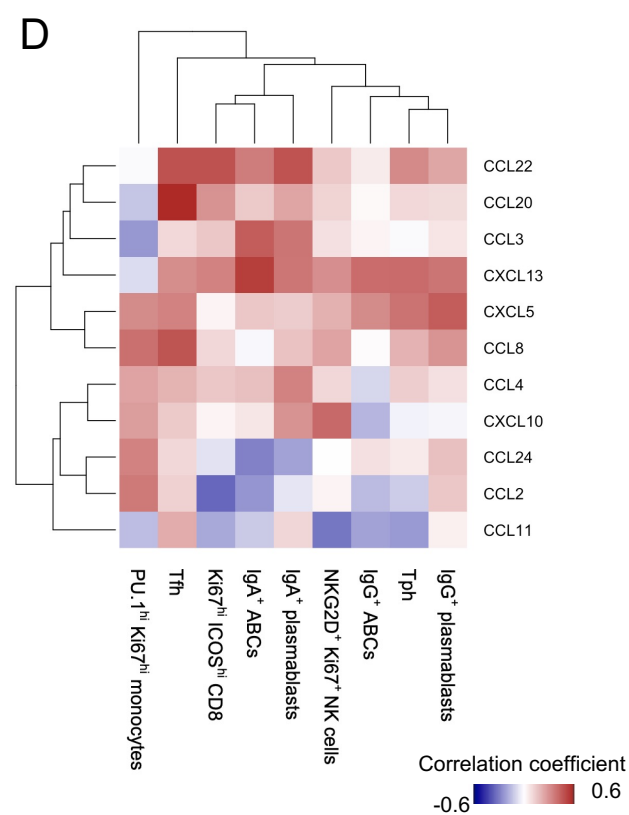



Figure 8

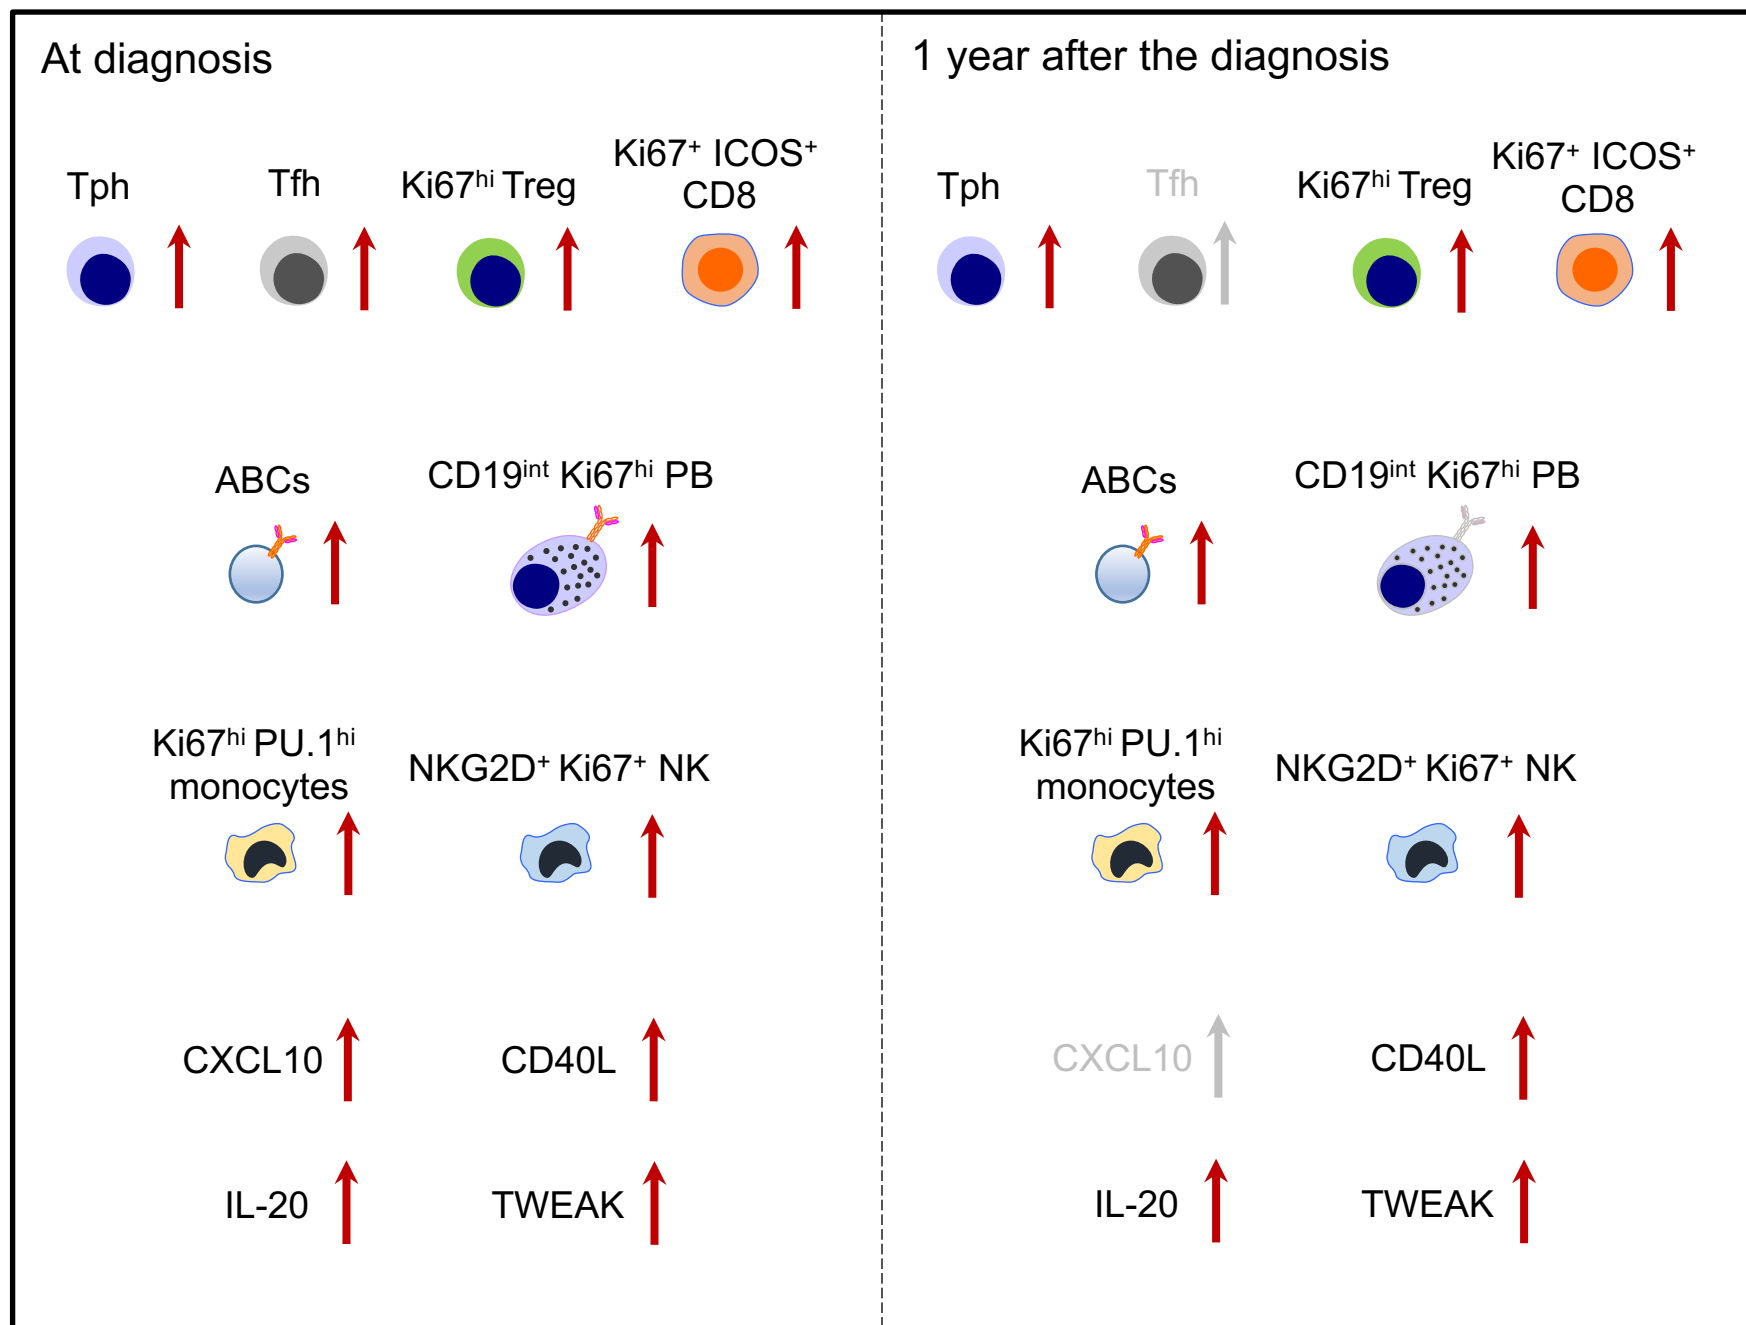

Source: https://www.biorxiv.org/content/biorxiv/early/2021/11/10/2021.11.08.467791.full.pdf
